***Mouse single nucleotide polymorphic targets for cross hybridization in rodents***

1  
2  
3  
4  
5  
6  
7  
8  
9  
10  
11  
12  
13  
14  
15  
16  
17  
18  
19  
  
20  
21  
22  
23  
24  
25  
26  
27

**Utility of a high-resolution mouse single nucleotide polymorphism microarray assessed for rodent comparative genomics**

**Short title: *Mouse single nucleotide polymorphic targets for cross hybridization in rodents***

Rachel D. Kelly, Maja Milojevic, Freda Qi, Kathleen A. Hill\*

<sup>1</sup>Department of Biology, *The University of Western Ontario*, London, Ontario, Canada

\* Corresponding author

Email: [khill22@uwo.ca](mailto:khill22@uwo.ca) (KH)

## *Mouse single nucleotide polymorphic targets for cross hybridization in rodents*

### 28 **Abstract**

29 In the study of genetic diversity in non-model species there is a notable lack of the low-cost, high  
30 resolution tools that are readily available for model organisms. Genotyping microarray  
31 technology for model organisms is well-developed, affordable, and potentially adaptable for  
32 cross-species hybridization. The Mouse Diversity Genotyping Array (MDGA), a single  
33 nucleotide polymorphism (SNP) genotyping tool designed for *Mus musculus*, was tested as a tool  
34 to survey genomic diversity of wild species for inter-order, inter-genus, and intra-genus  
35 comparisons. Application of the MDGA cross-species provides genetic distance information that  
36 reflects known taxonomic relationships reported previously between non-model species, but  
37 there is an underestimation of genetic diversity for non-Mus samples, indicated by a plateau in  
38 loci genotyped beginning 10-15 millions of years divergence from the house mouse. The number  
39 and types of samples included in datasets genotyped together must be considered in cross-species  
40 hybridization studies. The number of loci with heterozygous genotypes mapped to published  
41 genome sequences indicates potential for cross-species MDGA utility. A case study of seven  
42 deer mice yielded 159,797 loci (32% of loci queried by the MDGA) that were genotyped in these  
43 rodents. For one species, *Peromyscus maniculatus*, 6,075 potential polymorphic loci were  
44 identified. Cross-species utility of the MDGA provides needed genetic information for non-  
45 model species that are lacking genomic resources. Genotyping arrays are widely available,  
46 developed tools that are capable of capturing large amounts of genetic information in a single  
47 application, and represent a unique opportunity to identify genomic variation in closely related  
48 species that currently have a paucity of genomic information available. A candidate list of  
49 MDGA loci that can be utilized in cross-species hybridization studies was identified and may

***Mouse single nucleotide polymorphic targets for cross hybridization in rodents***

50 prove to be informative for rodent species that are known as environmental sentinels. Future

51 studies may evaluate the utility of candidate SNP loci in populations of non-model rodents.

52

53

## ***Mouse single nucleotide polymorphic targets for cross hybridization in rodents***

### 54 **Author Summary**

55 There is a need for a tool that can assay DNA sequence differences in species for which there is  
56 little or no DNA information available. One method of analyzing differences in DNA sequences  
57 in species with well-understood genomes is through a genotyping microarray, which has  
58 demonstrated utility cross-species. The Mouse Diversity Genotyping Array (MDGA) is a tool  
59 designed to examine known differences across the genome of the house mouse, *Mus musculus*.  
60 Given that related organisms share genetic similarity, the MDGA was tested for utility in  
61 identifying genome variation in other wild mice and rodents. Variation identified from distantly  
62 related species that were not of the same genus as the house mouse was an underestimate of the  
63 true amount of variation present in the genomes of wild species. Utility of the MDGA for wild  
64 species is best suited to mice from the same genus as the house mouse, and candidate variation  
65 identified can be tested in rodent populations in future studies. Identifying changes in genetic  
66 variation within populations of wild rodents can help researchers understand the links between  
67 specific genome changes and the ability to adapt to pressures in the environment, as well as  
68 better understand the evolution of rodents.

## *Mouse single nucleotide polymorphic targets for cross hybridization in rodents*

### 69 **Introduction**

70 The study and characterization of genomic diversity of non-model organisms is complicated by  
71 limitations in knowledge and genomic resources available [1]. By contrast, researchers studying  
72 model organisms benefit from the advantage of working with species that have sequenced and  
73 annotated genomes, and high throughput platforms to survey genetic diversity at low cost. There  
74 is a lack of genomic sequence information available for non-model species, and a deficit of tools  
75 to assay genomic diversity in understudied organisms [2–4]. There is a need for custom tools to  
76 survey genomic diversity in non-model organisms, but the creation of these tools can be time  
77 consuming and expensive. There is an opportunity to explore existing technologies designed for  
78 model organisms and test the applicability of these tools in non-model species.

79

80 Genotyping arrays are convenient tools that obtain large amounts of genetic diversity  
81 information in a single assay at low cost [5]. Genotyping arrays are designed to capture a large  
82 swath of diversity within a species, but the technology is typically tailored to the model species  
83 of interest. Hybridization of microarray oligos targeted to unique locations in test DNA of the  
84 organism of interest provides a picture of the genomic landscape of that sample [6]. Single  
85 nucleotide polymorphisms (SNPs) are single base pair genome variations found in at least one  
86 percent of individuals in a population, and are an informative type of genomic diversity that is  
87 captured by genotyping arrays [6,7]. SNPs are found in abundance throughout the genome, and  
88 this variation can be used as a metric of genomic diversity when comparing different individuals  
89 in a population, or different species of interest [8].

90

### ***Mouse single nucleotide polymorphic targets for cross hybridization in rodents***

91 There is a precedent for exploring the possibility of applying existing genotyping array  
92 technologies to related, non-model species. The majority of research examining the applicability  
93 of existing mammalian genotyping arrays in cross-species analyses focus on applying array  
94 technologies designed for agricultural and domestic breeding purposes to related species [2–4,9–  
95 14]. Researchers using a bovine genotyping array were able to identify a panel of over 100  
96 candidate SNPs conserved within two species of wild oryx, despite a 23 million year divergence  
97 time between oryx and modern cows [2]. Other researchers have applied domestic arrays to non-  
98 model organisms that diverged from the model species millions of years ago to identify SNPs  
99 associated with an ideal physical trait that would inform breeding strategies [4], or to identify  
100 sexually selected traits that are associated with the fitness of a non-model organism [11].

101

102 Looking at the research performed in the field of cross-species genotyping array use, we identify  
103 three metrics of success for the application of existing genotyping arrays to non-model species.  
104 The first metric of success for applicability of genotyping arrays cross-species is the  
105 identification of a panel of candidate SNPs that may be conserved between the model and non-  
106 model organisms. This panel of SNPs represents variation that can be successfully genotyped in  
107 the non-model organism of interest. While one metric of success for genotyping array use is the  
108 number of loci or positions in the genome that can be accurately genotyped, the ability to detect  
109 heterozygous loci is the second metric. Heterozygous loci, or positions in the genome in which  
110 both the major and minor alleles in a population can be genotyped, are key when surveying  
111 diversity in populations [2,3,15,16]. The third and final metric of success we have identified is  
112 the ability to validate the candidate panel of SNPs and heterozygous loci either through *in silico*

### ***Mouse single nucleotide polymorphic targets for cross hybridization in rodents***

113 methods for non-model species with some sequence information available, or by testing for the  
114 candidate SNPs in populations using alternative experimental methods.  
115  
116 Genotyping arrays have demonstrated utility in identifying polymorphic SNPs, or sites of  
117 variability within non-model organisms, which is an important goal for conservation studies of  
118 endangered species, and molecular ecology [2,3,17]. In one particular study, researchers  
119 Hoffman et al. (2013) applied a Canine HD Beadchip genotyping array to a population of  
120 Antarctic fur seals, despite a 44 million year divergence time between the species of seal and  
121 dogs [3]. Using the Canine HD Beadchip which queries over 173,000 SNP loci in dogs, the  
122 researchers were able to identify a panel of 173 polymorphic SNP loci that were conserved  
123 between the Antarctic fur seals and dogs [3]. A subset of the loci genotyped were validated *in*  
124 *silico* using available transcriptomic data. Gene ontology analysis of shared loci between dogs  
125 and seals showed that the panel of loci were involved in energy metabolism, suggesting the  
126 genomic markers conserved between dogs and seals were a part of a highly conserved functional  
127 pathway.  
128  
129 The identification of SNPs in non-model species can be used as markers of rapid evolution  
130 between populations [18], and a genotyping array would allow researchers to identify large lists  
131 of candidate SNP loci in a single application. The characterization of SNPs across the genomes  
132 of wild organisms is of keen interest to population geneticists as molecular markers for  
133 comparative studies [19]. Cross-species genotyping can provide information regarding variants  
134 that are involved in sexual selection [11], and variants tied to a phenotype of interest, which can  
135 inform breeding strategies [4]. A study by More et al. (2019) tested the utility of a Bovine SNP50

### ***Mouse single nucleotide polymorphic targets for cross hybridization in rodents***

136 array on the alpaca species *Vicugna pacos* which is bred domestically for its hair fiber that is  
137 economically valued [4]. The cross-species application of the Bovine SNP50 array allowed  
138 researchers to identify a panel of 400 polymorphic SNPs in the alpaca, and they were able to map  
139 209 SNPs to alpaca gene sequence information that was available [4]. This study helped identify  
140 a number of SNP markers with utility cross-species that is currently needed to help guide  
141 breeding practices for the alpaca species that will maximize high-quality hair fiber yield in the  
142 future. This study also highlights the need for the development of genomic tools capable of  
143 genotyping non-model species of interest.

144

145 There are a number of different genotyping arrays that have been applied cross-species to non-  
146 model organisms, but there has been little research focusing on cross-species genotyping in mice  
147 and other rodents. Mice are a peculiarity in that most genomic tools are designed for classical,  
148 inbred mice used in research, but mice and related rodents can be found all across the world.

149 There is a need for a tool that can survey diversity in non-model mice and other rodents.

150 Wild rodents represent unique research opportunities because of the unique selective pressures  
151 that are placed on them through human influence, and their ability to rapidly adapt to changing  
152 human environments [18,20]. For instance, deer mice from the genus *Peromyscus* make  
153 interesting candidates for non-model research as they can be found across North America and  
154 despite lacking fully sequenced and annotated reference genomes, they have been previously  
155 used as sentinels of environmental contaminants [21], and are becoming key organisms for  
156 evolutionary studies and molecular genetics [18,22,23]. While some genetic resources are  
157 available for deer mice and other rodents of interest, there remains a paucity of genomic



***Mouse single nucleotide polymorphic targets for cross hybridization in rodents***

158 information for these understudied species and few low-cost tools to assess genomic variation in  
159 a high-throughput manner.

160

161 The Mouse Diversity Genotyping Array (MDGA) is a tool designed to survey hundreds of  
162 thousands of SNP loci across the genome of the house mouse and was specifically created to  
163 maximize the amount of SNP diversity that can be identified within laboratory mouse strains and  
164 crosses [24]. After testing and the removal of poorly performing SNP probes, the MDGA was  
165 found to genotype 493,290 SNP loci within the genome of the house mouse [25]. The aim of our  
166 study is to explore the use of the MDGA for its utility as a cross-species genotyping tool. The  
167 MDGA was tested on 44 samples ranging in relatedness to the model house mouse, *Mus*  
168 *musculus*, that span different Genus, Family, and Orders of taxonomic classification (Table 1, S1  
169 Table). The goal was to identify the three metrics of success that define MDGA cross-species  
170 utility in related organisms. This study represents an advance in the field of mammalian cross-  
171 species genotyping that will add to the paucity of genomic sequence and SNP information  
172 available for non-model mice and rodents (Fig 1). It was hypothesized that application of the  
173 MDGA to wild rodent DNA samples will help elucidate potential polymorphic loci, or the  
174 number of loci that can detect both the A and B allele in a population, and that can be used cross-  
175 species in non-model organisms.

176

177

178

179

180

**Mouse single nucleotide polymorphic targets for cross hybridization in rodents**

181 **Table 1** Genotyping sets of study

182  
183  
184  
185  
186  
187

| Genotyping Test Sets |             | Common Name                   | Scientific Name                  |
|----------------------|-------------|-------------------------------|----------------------------------|
| Inter-Order          | Inter-Genus | House Mouse                   | <i>Mus musculus</i>              |
|                      |             | South-Eastern House Mouse     | <i>Mus musculus castaneus</i>    |
|                      |             | Earth-Colored Mouse           | <i>Mus dunni/Mus terricolor</i>  |
|                      |             | Servant Mouse/Bonhote's Mouse | <i>Mus famulus</i>               |
|                      |             | Sheath-Tailed Mouse           | <i>Mus fragilicauda</i>          |
|                      |             | Ryukyu Mouse                  | <i>Mus caroli</i>                |
|                      |             | Fawn-Colored Mouse            | <i>Mus cervicolor</i>            |
|                      |             | Cook's Mouse                  | <i>Mus cookii</i>                |
|                      |             | Flat-Haired Mouse             | <i>Mus platythrix</i>            |
|                      |             | Rock-Loving Mouse             | <i>Mus saxicola</i>              |
|                      |             | Gairdner's Shrewmouse         | <i>Mus pahari</i>                |
|                      |             | African Pygmy Mouse           | <i>Mus (nannomys) minutoides</i> |
|                      |             | Orange Pygmy Mouse            | <i>Mus (nannomys) orangiae</i>   |
|                      |             | Matthey's Mouse               | <i>Mus (nannomys) mattheyi</i>   |
|                      |             | Wood Mouse                    | <i>Apodemus sylvaticus</i>       |
|                      |             | Sprague Dawley Rat            | <i>Rattus norvegicus</i>         |
|                      |             | Wistar Rat                    | <i>Rattus norvegicus</i>         |
|                      |             | Aztec Mouse                   | <i>Peromyscus aztecus</i>        |
|                      |             | California Mouse              | <i>Peromyscus californicus</i>   |
|                      |             | North American Deer Mouse     | <i>Peromyscus maniculatus</i>    |
|                      |             | Sonoran Deer Mouse            | <i>Peromyscus maniculatus</i>    |
|                      |             | Plateau Deer Mouse            | <i>Peromyscus melanophrys</i>    |
|                      |             | Oldfield Mouse/Beach Mouse    | <i>Peromyscus polionotus</i>     |
|                      |             | White-Footed Mouse            | <i>Peromyscus leucopus</i>       |
|                      |             | Squirrel                      | Sciuridae                        |
|                      |             | Naked Mole Rat                | <i>Heterocephalus glaber</i>     |
|                      |             | African Black Rhino           | <i>Diceros bicornis</i>          |
|                      |             | Mountain Tapir/Woolly Tapir   | <i>Tapirus pinchaque</i>         |

Genotyping sets organized in descending order according to bounds of taxonomic classification and differences in maximum genetic divergence of a test set from the reference C57BL/6J (*Mus musculus*) organism

## *Mouse single nucleotide polymorphic targets for cross hybridization in rodents*

### 188 **RESULTS**

#### 189 **Cross-species test sets exceed maximum genetic diversity of the training set**

190 A training set of DNA samples from 114 classical, inbred laboratory mice was used in training  
191 the genotyping algorithm employed by Affymetrix Power Tools to provide accurate genotypes  
192 (S2 Table). Genetic distances reflect the relatedness between samples and were obtained from  
193 calculations of SNP distances derived from raw genotyping results. The maximum genetic  
194 distance of the training set is approximately 0.225 with respect to the reference C57BL/6J house  
195 mouse (Fig 2). The intra-genus test set of 27 species from the genus *Mus* has a maximum genetic  
196 distance value of 0.836 and is over three times larger than the maximum genetic distance of the  
197 reference set of 114 classical inbred mice (Fig 2). A case study of seven *Peromyscus* samples  
198 genotyped together has a maximum genetic distance of 0.941 from the house mouse, and far  
199 exceeds the diversity of the training set. Also, the maximum genetic distance of the inter-order  
200 test set (n=44, 96 MYD) is 0.938, and is over four times larger than the maximum genetic  
201 diversity represented in the training set (Fig 2). The training set used does not encapsulate the  
202 genetic diversity of the test sets.

203

204 The samples of the inter-order test set are significantly different in genotypic composition and  
205 allelic frequency ( $P < 0.0001$ ; Fisher's exact test with Monte Carlo simulation). The samples of  
206 the intra-genus test set of only *Mus* samples are also significantly different in genotypic and  
207 allelic frequency ( $P < 0.0001$ ). Two *R. norvegicus* samples were compared to one another as a  
208 control and the genotypic composition is not significantly different ( $p = 0.0934$ ). Differences in  
209 allelic composition between *R. norvegicus* samples are also not significant ( $p = 0.2232$ ). The four

### ***Mouse single nucleotide polymorphic targets for cross hybridization in rodents***

210 *H. glaber* (naked mole rat) samples genotyped together are significantly different in the genotype  
211 composition ( $p < 0.0001$ ), but not allelic composition ( $p = 0.0038$ ).

212

#### **213 Underestimation of genetic diversity occurs when genotyping across multiple genera**

214 For the inter-order genotyping set ( $n = 44$ ), a general decrease is observed in the percentage of loci  
215 genotyped as divergence time increases from *M. musculus* ( $r = -0.57$ ;  $p\text{-value} < 0.0001$ ; Fig 3A).

216 As divergence time increases from *M. musculus*, the number of ‘no calls’, or inability to  
217 determine a genotype at a locus, increases. A plateau in the percentage of loci genotyped is  
218 observed between 10-15 MYD for non-Mus samples from the inter-genus test set. Loci with  
219 heterozygous genotypes were of particular interest, as those loci have the potential to identify  
220 both the major and minor alleles in a population (polymorphic loci). The percentage of loci that  
221 had a heterozygous genotype increases as divergence time from the house mouse increases (Fig  
222 3B). There is a positive correlation between increasing percent heterozygosity and the known  
223 divergence times from the house mouse ( $r = 0.67$ ;  $p\text{-value} < 0.0001$ ). Similar to the percentage of  
224 loci genotyped, a plateau in percent heterozygosity is also observed to begin between 10-15  
225 million years divergence from *M. musculus* (Fig 3B).

226

#### **227 MDGA captures the genetic diversity of wild samples from the genus Mus**

228 As seen in the inter-order test set, there is a general decrease in the percentage of loci that were  
229 genotyped in samples of the intra-genus test set (Fig 4A). There is a negative correlation between  
230 the percentage of loci genotyped and the known divergence times from *M. musculus* ( $r = -0.76$ ;  
231  $p < 0.0001$ ). In the intra-genus test set, heterozygosity increases as divergence time increases (Fig  
232 4B). The increase in percent heterozygosity of Mus samples is positively correlated with an

### ***Mouse single nucleotide polymorphic targets for cross hybridization in rodents***

233 increase in divergence times ( $r = 0.93$ ;  $p\text{-value} < 0.0001$ ). There is no plateau or obvious  
234 underestimate of genetic diversity for samples in the intra-genus test set.

235

236 A tree of relatedness derived from SNP-based genetic distance values differentiates *Mus* samples  
237 of the intra-genus test set from one another at a species level (Fig 5). Enough genetic diversity is  
238 captured using the MDGA to reflect the known taxonomic relationships between the intra-genus  
239 samples at a species level. At 9.5 MYD, the pygmy mouse subspecies *M. n. minutoides* is  
240 grouped with the subspecies *M. n. orangiae* and not the replicate data file of the same species.

241

#### **242 *Peromyscus* case study**

243 Seven *Peromyscus* species were genotyped together as a case study to determine if the MDGA  
244 could provide useful results that reflect known biological diversity for a number of species of a  
245 different genus from *Mus*. Of the *Peromyscus* samples queried, approximately 52% of loci  
246 queried by the array produce a genotype (Table 2). There are 159,797 loci genotyped across all  
247 seven samples (32% of loci queried by the array) despite a 32.7 million-year divergence time  
248 from *M. musculus*. SNP-based genetic distances of *Peromyscus* species were utilized to produce  
249 trees of genetic relatedness that reflect the known divergence times of these species (Fig 6). Top  
250 KEGG pathway annotations of the genotyped loci in *Peromyscus* samples are associated with  
251 neurological signaling (Table 3).

**Mouse single nucleotide polymorphic targets for cross hybridization in rodents**

252

**Table 2** Percentage of loci genotyped and percent heterozygosity in a *Peromyscus* case study (n=7)

| MDGA Data (CEL) File       | Sample Scientific Name   | Loci Genotyped (%) | Heterozygosity (%) |
|----------------------------|--------------------------|--------------------|--------------------|
| SNP_mDIV_B2-660_102109.CEL | <i>P. melanophrys</i>    | 51.31              | 34.83              |
| SNP_mDIV_B1-659_102109.CEL | <i>P. aztecus</i>        | 52.03              | 36.02              |
| SNP_mDIV_B3-661_102109.CEL | <i>P. californicus</i>   | 52.13              | 36.27              |
| SNP_mDIV_B4-662_102109.CEL | <i>P. m. sonoriensis</i> | 52.26              | 35.95              |
| SNP_mDIV_B5-663_102109.CEL | <i>P. m. bairdii</i>     | 52.27              | 36.71              |
| SNP_mDIV_B6-664_102109.CEL | <i>P. polionotus</i>     | 52.57              | 37.02              |
| SNP_mDIV_B8-666_102109.CEL | <i>P. leucopus</i>       | 52.62              | 36.55              |

253

254

255

**Table 3** Top KEGG<sup>1</sup> (Kyoto Encyclopedia of Genes and Genomes) pathways determined using the DAVID functional annotation tool

| KEGG Pathway associated with SNP loci genotyped in <i>Peromyscus</i> species (p<0.001) |
|----------------------------------------------------------------------------------------|
| Glutamatergic synapse                                                                  |
| Circadian entrainment                                                                  |
| Axon guidance                                                                          |
| Retrograde endocannabinoid signaling                                                   |
| Dopaminergic synapse                                                                   |
| Morphine addiction                                                                     |
| Long-term depression                                                                   |
| Hippo signaling pathway                                                                |
| cAMP signaling pathway                                                                 |
| Cholinergic synapse                                                                    |
| Rap1 signaling pathway                                                                 |
| Long-term potentiation                                                                 |
| GABAergic synapse                                                                      |

256

257

258

259

260

<sup>1</sup>Enriched KEGG (Kyoto Encyclopedia of Genes and Genomes) pathways determined using DAVID (Database for Annotation, Visualization, and Integrated Discovery) functional annotation tool

**Mouse single nucleotide polymorphic targets for cross hybridization in rodents**

261 ***In silico* cross-validation of potential polymorphic loci**

262 *P. maniculatus* was examined given that there is a partial genome sequence available online for  
 263 *in silico* search of unique and perfect 25 nt MDGA probe target sequence matches. There are  
 264 226,265 loci on the MDGA genotyped (~52%) for both *P. maniculatus bairdii* and *P.*  
 265 *maniculatus sonoriensis* within this study. Of the loci that were genotyped, there are 143,971 loci  
 266 that were genotyped as heterozygous in both *P. maniculatus* samples (Table 4). Heterozygous  
 267 loci represent potential polymorphic loci that can query both the common and uncommon allele  
 268 in a population. There are 6,075 MDGA probe sequences that perfectly match a unique position  
 269 within the *P. maniculatus* genome, and 481 of the *in silico* sequence matches are associated with  
 270 heterozygous loci.

271

272 **Table 4** *In silico* validation of potential polymorphic loci conserved cross-species

| Common Name           | Scientific Name               | MYD from <i>M. musculus</i> | Unique in <i>in silico</i> matches of alleles queried | Number of heterozygous loci in all samples | Number of candidate polymorphic loci |
|-----------------------|-------------------------------|-----------------------------|-------------------------------------------------------|--------------------------------------------|--------------------------------------|
| Ryukyu Mouse          | <i>Mus caroli</i>             | 7.41                        | 303,680                                               | 147,452                                    | 9,413                                |
| Gairdner's Shrewmouse | <i>Mus pahari</i>             | 8.29                        | 152,971                                               | 251,902                                    | 9,341                                |
| Rat                   | <i>Rattus norvegicus</i>      | 20.9                        | 61,372                                                | 85,926                                     | 1,019                                |
| Deer Mouse            | <i>Peromyscus maniculatus</i> | 32.7                        | 6,075                                                 | 143,971                                    | 481                                  |
| Naked Mole Rat        | <i>Heterocephalus glaber</i>  | 73                          | 1,179                                                 | 91,324                                     | 52                                   |

273 MYD=Millions of Years Divergence

274 Candidate Polymorphic Loci are the number of loci identified that had a heterozygous genotype  
 275 call for the samples using the Mouse Diversity Genotyping Array Data that could also be mapped  
 276 to the available genomic sequences for these organisms.

277

### ***Mouse single nucleotide polymorphic targets for cross hybridization in rodents***

278 An average of 382,968 loci were genotyped between three available *M. caroli* CEL files using  
279 the MDGA, and there are 303,680 unique theoretical matches to the *M. caroli* genome  
280 determined through an *in silico* search using E-MEM (Table 4). A shrew mouse (*M. pahari*)  
281 applied to the array has 411,514 loci that were genotyped experimentally using the MDGA.  
282 Theoretically, there are 152,971 unique sequences from the MDGA that are present in the shrew  
283 mouse only once (Table 4). The pathways associated with genotyped loci in *M. musculus*, *M.*  
284 *caroli*, and *M. pahari* that are shared between these three species are primarily signaling  
285 pathways and pathways involved in maintaining the structural integrity of a cell, such as focal  
286 adhesion and adherens junction (Table 5). The Sprague Dawley rat (*R. norvegicus*) has a fully  
287 sequenced and annotated genome available online. There are 170,156 loci that were genotyped  
288 experimentally in both *R. norvegicus* samples using the MDGA. Using the E-MEM *in silico*  
289 program, 61,372 sequences were determined to be theoretically present within the genome  
290 (Table 4).

291  
292  
293  
294  
295  
296  
297  
298  
299  
300  
301  
302  
303  
304  
305  
306  
307  
308  
309  
310



## ***Mouse single nucleotide polymorphic targets for cross hybridization in rodents***

311 **Table 5** Top KEGG pathways enriched for house mouse gene annotations with genotype  
312 assignments across wild *Mus* species

---

KEGG pathways<sup>1</sup> significant ( $p < 0.001$ ) in reference house mouse (build 38) and wild *Mus* test samples<sup>2</sup>

---

Focal adhesion  
Rap1 signaling pathway  
Adherens junction  
cAMP signaling pathway  
ErbB signaling pathway  
cGMP-PKG signaling pathway  
Neuroactive ligand-receptor interaction  
Platelet activation  
Calcium signaling pathway  
Purine metabolism  
Phosphatidylinositol signaling system  
Amoebiasis  
Regulation of actin cytoskeleton  
PI3K-Akt signaling pathway  
Oxytocin signaling pathway

---

313 <sup>1</sup>Enriched KEGG (Kyoto Encyclopedia of Genes and Genomes) pathways determined using  
314 DAVID (Database for Annotation, Visualization, and Integrated Discovery) functional  
315 annotation tool

316 <sup>2</sup>*Mus* test samples are *M. pahari* and *M. caroli* species

317 KEGG pathways are shared between the reference *M. musculus*, *M. pahari*, and *M. caroli* species  
318

319

320 Special attention was given to potential polymorphic loci that were genotyped as heterozygous in  
321 samples using the MDGA and could be cross-validated as being present in the genome using an  
322 *in-silico* search of publicly available genome sequences. There is a trend of there being more  
323 heterozygous loci genotyped using the MDGA than the number of those loci that can be cross  
324 validated as present in the publicly available genome sequence (Table 4). There are 147,452  
325 heterozygous loci genotyped in all three *M. caroli* samples, and 9,413 of these loci were  
326 validated as present in the publicly available genome sequence (Table 4). There are 9,341 of the  
327 147,452 heterozygous loci genotyped in a *M. pahari* sample that were cross validated as

***Mouse single nucleotide polymorphic targets for cross hybridization in rodents***

328 potential polymorphic SNP loci (Table 4). In two *R. norvegicus* samples, there are 85,926 loci  
329 that were genotyped empirically using the MDGA, and 1,019 loci that were cross-validated using  
330 an *in-silico* genome sequence search (Table 4).

331

332

333

334

## *Mouse single nucleotide polymorphic targets for cross hybridization in rodents*

### 335 **Discussion**

336 Specialized genotyping arrays have been successfully applied cross-species to closely related  
337 organisms in previous research [2–4,9–13,16,32–34]. Here we present evidence that the MDGA  
338 can be applied to wild rodents to produce SNP genotyping results that reflect the known  
339 taxonomic relationships between test samples and the reference house mouse. The identification  
340 of polymorphic SNPs within non-model organisms is of great interest, as these genetic markers  
341 can be used to assay diversity in wild populations in studies of population genetics [2–  
342 4,9,16,18,34,35]. Panels of candidate polymorphic SNPs have been identified for wild species of  
343 the genus *Mus* and *Peromyscus*. This study is a first step in contributing where there is a paucity  
344 of information available for non-model rodent species.

345

346 Outside of the genus *Mus*, the plateau in SNP loci genotyped and the percentage of heterozygous  
347 loci is attributed to off-target mutations that hinder DNA hybridization to array probe sequences.  
348 When DNA hybridizes to a probe on the MDGA, the hybridization does not have to be a perfect  
349 25 nt match, where incomplete hybridization of the sample DNA to the probe is enough to result  
350 in a genotype assignment [36]. Determination of the divergence time from *M. musculus* at which  
351 genetic diversity is underestimated is limited by the samples available for use in this study. A  
352 greater number of species genotyped using the MDGA that have a divergence time between 10–  
353 15 MYD from the house mouse would be beneficial in identifying situations where  
354 underestimations of genetic diversity occur. Miller et al. (2012), found previously that applying  
355 the Bovine, Ovine, and Equine SNP50 Beadchip arrays cross-species resulted in a linear decrease  
356 in genotyped loci as the millions of years of divergence from the model species increased [10].  
357 Previous studies that have examined the utility of the cross-species application of commercially

### ***Mouse single nucleotide polymorphic targets for cross hybridization in rodents***

358 available genotyping array technology have identified trends of decreasing ability to genotype  
359 loci as divergence time from the model organism increases as well [8,9]. This study is unique as  
360 it tests the array technology on a wide range of species spanning multiple millions of years  
361 divergence from the reference house mouse.

362

363 Previous research has determined potentially conserved sequences between model organisms and  
364 the wild species of interest through application of commercial arrays to test samples [2,4]. This  
365 study of the MDGA cross-validates genotyped loci in rodent samples with an *in silico* analysis of  
366 available genomic sequences for wild species. The heterozygous SNP variation in rodent samples  
367 of this study cross-validated through *in silico* analyses represents candidate polymorphic SNPs  
368 that can be tested for conservation in populations of wild species of *Mus* and *Peromyscus*. To be  
369 truly considered a polymorphic SNP conserved cross-species, the variation must be validated in  
370 wild populations with the alternate, or minor allele present in at least 1% of the population.

371

372 A major difficulty in cross-species genotyping using array data is the assembly of appropriate  
373 test sets that would allow for accurate genotyping. Previous research has demonstrated that the  
374 genotyping algorithm recommended by Affymetrix, BRLMM-P, is sensitive to the composition  
375 of the samples included in a test set [37,38]. Samples in a test set that are more similar to one  
376 another genetically will produce fewer false genotyping results [38]. The number of loci  
377 genotyped can become inflated if the samples in the test set are too genetically different, as was  
378 seen when samples of different orders of classification were genotyped together in the inter-order  
379 test set. The greater genetic homogeneity of only *Mus* samples in the intra-genus test set  
380 produced genotyping results that matched what was expected of the species based on divergence

### ***Mouse single nucleotide polymorphic targets for cross hybridization in rodents***

381 times. The linear decrease in loci genotyped in *Mus* samples as divergence time increased  
382 reflected previous cross-species findings [10]. Recommendations for the construction of a test set  
383 of samples for an experiment utilizing the MDGA cross-species would be dependent upon the  
384 hypothesis tested. A large number of samples are needed to establish whether the minor allele of  
385 a SNP is present in populations of non-model species for at least 1% of the population [7,39].  
386 Technical replicates should be included to assess the quality of DNA hybridization to array  
387 probes for a particular species. Optimization of hybridization conditions should be made to  
388 reduce differences in array hybridization intensities and the resulting differences in genotype  
389 assignments between technical replicates.

390

391 The use of a training set that has sufficient genetic diversity to encompass that of the  
392 experimental test sets can assist in producing accurate genotyping of samples [40,41]. The  
393 training set of 114 classical inbred strains of mice used in this study does not encompass the high  
394 relative genetic diversity of the sample sets of this cross-species study. A training set optimized  
395 for cross-species genotyping would be composed of members of the same species as the test set  
396 and would be validated using another method such as sequencing. Inclusion of male and female  
397 samples would ensure more accurate genotype assignments on the X chromosome, as  
398 hemizygous males are assigned a diploid homozygous genotype [42]. Analyzing SNPs on the X  
399 chromosome separately from autosomal SNPs and separating male and female samples would  
400 aid in fewer false genotype assignments.

401

402 In comparing the research knowledge gained through this study using the deer mouse (*P.*  
403 *maniculatus*) to the knowledge obtained from the study of Antarctic fur seals by Hoffman et al.

***Mouse single nucleotide polymorphic targets for cross hybridization in rodents***

404 (2013), similar metrics of utility were obtained through cross-species genotyping (Table 6).  
 405 Given that the mouse array targets over two times the number of positions than the canine array  
 406 targets, there is a much larger number of loci that can be genotyped in the deer mouse than the  
 407 Antarctic fur seal. Future studies will focus on validating a panel of SNPs that are polymorphic  
 408 in deer mouse populations. Pathway analyses are limited by the information assayed by each  
 409 technology and are with respect to the annotations of the model organisms. As new sequence  
 410 information and genome annotations become available for the deer mouse, it will be interesting  
 411 to see which SNP markers associated with conserved pathways will be found to be shared  
 412 between the house mouse and the deer mouse. The deer mouse is an intriguing sentinel of  
 413 environmental effects and a model for population studies that has a surprising lack of genomic  
 414 information available [18,43]. Cross-species array use may be one technique to identify SNP  
 415 diversity in these relevant species until genome sequencing prices become more affordable for  
 416 non-model species. The use of a rat genotyping array in the future may be of use, as the deer  
 417 mouse and rat share greater genetic synteny than with the mouse [44].

418 **Table 6. Comparison of the *Hoffman et al. (2013)* model study with the current study**

| <b>Hoffman <i>et al.</i></b> | <b>Comparison</b>                                   | <b>Kelly <i>et al.</i></b> |
|------------------------------|-----------------------------------------------------|----------------------------|
| Antarctic fur seal           | Non-model species                                   | Deer Mouse                 |
| CanFam2.0                    | Reference genome for array                          | <i>Mus musculus</i>        |
| 44                           | MYD from model species                              | 32.7                       |
| 173,662                      | Loci queried by array                               | 493,290                    |
| 33,324                       | Loci genotyped                                      | ~226,000                   |
| 2 of 5                       | Loci validated in silico                            | 3,195                      |
| 173                          | Polymorphic loci                                    | 481                        |
| 2                            | Loci validated in a population                      | Future                     |
| Energy metabolism            | Pathways shared between model and non-model species | Neurological signaling     |

419 MYD = Million years divergence

420

### ***Mouse single nucleotide polymorphic targets for cross hybridization in rodents***

421 There is a great potential for cross-species MDGA utility for wild *Mus* species in providing  
422 genomic markers for research in mouse population genetics and studies of rodent evolution.  
423 Genotype data generated from application of the MDGA captured enough genetic diversity to  
424 differentiate *Mus* samples at a species level. Further testing is required to determine if the  
425 MDGA can capture enough diversity to differentiate between subspecies. As in the case of the  
426 deer mouse, wild *Mus* species represent an untapped wealth of genomic information that would  
427 benefit researchers of environmental mutagens, evolution, and population genetics. With newer  
428 mouse array technologies becoming available that have greater capacity for high-throughput  
429 analysis, novel polymorphic SNPs in non-model rodents can be identified through a low-cost and  
430 efficient manner.

431

432 Utilizing the Mouse Diversity Genotyping Array for cross-species genotyping represents a first  
433 step towards development of a tool that can rapidly identify SNP variation in wild rodent species.  
434 A panel of candidate SNPs on the MDGA have been identified for use with wild mouse species  
435 and was cross validated using an *in silico* genome search. Future work may address the  
436 validation of this candidate cross-species panel in wild populations. This research highlights the  
437 need for greater genomic resources for wild rodents and demonstrates the potential of the MDGA  
438 as a high-throughput genotyping tool for non-model organisms. The development of novel tools  
439 specialized for non-model species opens up previously inaccessible avenues of research. Next-  
440 generation sequencing technologies are often not accessible and too costly for a majority of  
441 researchers with population-based research questions that require rapid, high-throughput genome  
442 wide analysis of variation. Until the price of sequencing and the complexity of assembling new  
443 reference genome assemblies is reduced, the adaptation of existing genomic tools for use with

***Mouse single nucleotide polymorphic targets for cross hybridization in rodents***

444 closely related species is one method researchers can use to combat the genomic disparity

445 between studying model and non-model species.

446

447

448

449

450

451

452

453

454

455

456

457

458

459

460

461

462

463

464

465

466



## ***Mouse single nucleotide polymorphic targets for cross hybridization in rodents***

### 467 **MATERIALS AND METHODS**

#### 468 **Cross-species samples**

469 Forty publicly available MDGA raw data (CEL) files were downloaded from the Center for  
470 Genome Dynamics at the Jackson Laboratory (2012, The Jackson Laboratory;  
471 <ftp.jax.org/petrs/MDA/>). Four MDGA CEL files of *H. glaber* DNA cross-hybridization to the  
472 MDGA were generated in-house. The forty-four samples consist of twenty-seven Mus CEL files,  
473 two Rattus CEL files, seven Peromyscus CEL files, one Apodemus CEL file, and CEL files  
474 representing more highly diverged species including a squirrel, four naked mole rats, a tapir, and  
475 an African Black Rhino (S3 Table). CEL file raw array intensity images were analyzed for  
476 quality and abnormalities in array images were noted. Two CEL files (S1 Fig) were noted for  
477 having an abnormal spot with uneven DNA hybridization to the array. Due to the redundancy of  
478 probes on the MDGA, it was determined that abnormal CEL file images still had sufficient  
479 genomic coverage to be used for further analysis and were not removed from the study.

480

#### 481 **SNP genotyping**

482 Samples were genotyped using the protocol outlined by Locke et al. [25]. Affymetrix Power  
483 Tools was used to generate genotype calls of AA, AB, BB, or No Call (numerical representations  
484 0, 1, 2, -1, respectively) using the BRLMM-P algorithm for 493,290 SNPs [25] (Affymetrix  
485 Power Tools (APT) Release 1.16.0). A training set of 114 classical laboratory mouse CEL files  
486 obtained from a set of 351 mice utilized by Didion et al. (2012) was used in conjunction with  
487 BRLMM-P to train the algorithm in accurate assignment of genotypes [26]. The samples were  
488 organized into three test sets that were genotyped separately from one another. The first  
489 genotyping set (known as the inter-order test set) consists of all 44 CEL files representing species

## ***Mouse single nucleotide polymorphic targets for cross hybridization in rodents***

490 spanning different orders of classification and a maximum divergence time of 96 million years of  
491 divergence (MYD) from the reference house mouse, *Mus musculus* (Table 1). The second test set  
492 (the intra-genus test set) is composed of the 27 samples from the genus *Mus* and has a maximum  
493 divergence of 9.5 MYD from the house mouse (Table 1). The third test set (*Peromyscus* case  
494 study test set) was composed of seven deer mouse species from the genus *Peromyscus* that have  
495 32.7 MYD from the house mouse (Table 1). The genotyping results obtained were analyzed and  
496 compared to reference genotyping data from *Mus musculus*. The reference *Mus musculus* data  
497 was obtained by averaging the genotyping results from 8 *Mus musculus* samples (percentage of  
498 loci genotyped > 99%).

499

### **500 Estimation of divergence times**

501 The estimated divergence time of each species from the reference house mouse was obtained  
502 using an evolutionary timetree of life (<http://www.timetree.org/>) [27] with a few exceptions. The  
503 estimated divergence of the subspecies *M. m. castaneus* was determined through previous work  
504 by Geraldine et al. (2012) [28], and the evolutionary divergence time of the pygmy mouse species  
505 from the house mouse was determined by Kouassi et al. (2008) [29].

506

### **507 Statistical analyses**

508 A Fisher's exact test was utilized to assess the extent of genetic differences between samples  
509 genotyped together. A nonparametric, unordered, Fisher-Freeman-Halton exact test (Monte  
510 Carlo simulation) was performed using the StatXact statistical analysis software package  
511 (CYTEL Software, Cambridge, MA). Pearson's *r* was used in tests of significance of correlations  
512 between the genotyping results of the test set samples using Graphpad Prism 8 software.

## ***Mouse single nucleotide polymorphic targets for cross hybridization in rodents***

513

### **514 Genetic distance calculations**

515 Pairwise comparison of SNP genotypes between species in the inter-order test set was utilized to  
516 create SNP-based distance matrices using R. The distance matrix values used to create  
517 phenograms (SNP trees) were generated using an in-house R script courtesy of Marjorie E.  
518 Osbourne Locke. The in-house script utilized the ‘bionj’ R package to create a tree of genetic  
519 relatedness using the neighbour-joining method [30]. The resulting trees were modified using  
520 Figtree (v1.4.3) software. Pairwise genetic distances were computed by dividing the total number  
521 of genotypic differences between two samples by the total number of loci queried by the MDGA,  
522 where 493,290 total loci were used in this study [25]. The values in the distance matrix are a  
523 numerical representation of the amount of genetic diversity between test species analyzed and the  
524 reference house mouse. A genetic distance value of zero indicates the species are genetically the  
525 same at the loci queried, and a value of one indicates the species compared are completely  
526 genetically dissimilar from one another at the loci queried. The estimated evolutionary  
527 relationships seen in the SNP trees generated were compared to the divergence times of test  
528 samples from the reference house mouse provided in literature and the Timetree database [27–  
529 29].

530

### **531 *In silico* validation of MDGA loci genotyped cross-species and pathway analysis**

532 *In silico* validation of loci genotyped from MDGA data was performed using the program E-  
533 MEM (efficient computation of maximal exact matches for very large genomes) designed by  
534 Khiste and Ilie (2015) [31]. The publicly available genomes of rodents were searched for the  
535 unique presence of MDGA probe sequences. E-MEM was employed to search a publicly

***Mouse single nucleotide polymorphic targets for cross hybridization in rodents***

536 available genome of wild rodents available on NCBI (S4 Table) for perfect 25 nt MDGA SNP  
537 probe target sequences that have only one genomic match (<ftp.ncbi.nlm.nih.gov/genomes/>).  
538 Unique MDGA matches discovered via E-MEM were identified and then compared with the list  
539 of heterozygous loci genotyped using the MDGA. Ensembl gene IDs associated with candidate  
540 loci genotyped were analyzed using the Database for Annotation, Visualization, and Integrated  
541 Discovery (DAVID).  
542

## *Mouse single nucleotide polymorphic targets for cross hybridization in rodents*

### 543 **Acknowledgements**

544 Tail-tissue samples of four *Heterocephalus glaber* individuals were given to the Hill Laboratory  
545 by Dr. Melissa Holmes (Associate Professor at the University of Toronto, Mississauga Campus).  
546 CEL files of the rhino and tapir samples were donated by Karen Svenson from the Jackson  
547 Laboratory. Permission to use squirrel CEL file data was given to the Hill Laboratory by Dr.  
548 Fernando Pardo Manuel de Villena from the University of North Carolina at Chapel Hill.  
549 Assistance with E-MEM code was provided by Dr. Lucien Ilie (University of Western Ontario,  
550 London) and his student Qin Dong.

551

552

### 553 **Figure Legends**

#### 554 **Fig 1. Summary of published research on mammalian cross-species genotyping using SNP** 555 **genotyping microarrays**

556 (A) Published research is organized in increasing order of genetic divergence in millions of years  
557 divergence (MYD) of non-model test samples from the model reference organism. Authors,  
558 publication year, genotyping microarray technology, and approximate number of loci queried (in  
559 thousands) are listed for each publication. (B) The sample of publications on mammalian cross-  
560 species array studies with the 13<sup>th</sup> representing the contributions of this thesis to the cross-species  
561 genotyping array field.

562

#### 563 **Fig 2. Genetic diversity of test sets exceeds maximum genetic diversity of training set**

564 Boxplots representing the minimum, first quartile, median, third quartile, and maximum genetic  
565 distances for the training set (n=114), intra-genus test set (n=27), case study of *Peromyscus*  
566 (n=7), and inter-order test set (n=44). All genetic distances are with respect to the reference  
567 house mouse *Mus musculus*.

568

#### 569 **Fig 3. Underestimation of genetic diversity for highly diverged species in cross-species** 570 **genotyping**

571 (A) The percentage of loci genotyped from the inter-order test set (n=44). (B) The percentage of  
572 loci from the inter-order test set with a heterozygous genotype call. MYD = Millions of years  
573 divergence, with respect to the reference *Mus musculus*.

574

575

576

## *Mouse single nucleotide polymorphic targets for cross hybridization in rodents*

### 577 **Fig 4. Genetic diversity of wild *Mus* species**

578 (A) The percentage of loci genotyped from the intra-genus test set (n=27). (B) The percentage of  
579 loci from the intra-genus test set with a heterozygous genotype call. MYD = Millions of years  
580 divergence, with respect to the reference *Mus musculus*.

581

### 582 **Fig 5. SNP distance-based tree of genetic relatedness reflects known taxonomic** 583 **relationships between *Mus* species**

584 SNP distance-based tree of genetic relatedness of samples from the intra-genus test set (n = 27).  
585 At 9.5 MYD a pygmy mouse subspecies *M. n. orangiae* has SNP-based genetic distances that  
586 reflect greater genetic similarity to another pygmy mouse subspecies *M. n. minutoides* than the  
587 replicate MDGA data file of the same *M. n. orangiae* sample. MYD = Millions of years  
588 divergence, with respect to the reference *Mus musculus*.

589

### 590 **Fig 6. SNP distance-based tree of genetic relatedness reflects known taxonomic** 591 **relationships between *Peromyscus* species**

592 Pairwise SNP distance-based tree of genetic relatedness of samples from the intra-genus test set  
593 of *Peromyscus* species (n=7).

594

595

596

597

## **References**

- 598 1. Russell JJ, Theriot JA, Sood P, Marshall WF, Landweber LF, Fritz-Laylin L, et al. Non-  
599 model model organisms. *BMC Biol.* 2017;15: 55. doi:10.1186/s12915-017-0391-5
- 600 2. Ogden R, Baird J, Senn H, McEwing R. The use of cross-species genome-wide arrays to  
601 discover SNP markers for conservation genetics: A case study from Arabian and scimitar-  
602 horned oryx. *Conserv Genet Resour.* 2012;4: 471–473. doi:10.1007/s12686-011-9577-2
- 603 3. Hoffman JI, Thorne MAS, McEwing R, Forcada J, Ogden R. Cross-Amplification and  
604 Validation of SNPs Conserved over 44 Million Years between Seals and Dogs. *PLoS One.*  
605 2013;8: 1–10. doi:10.1371/journal.pone.0068365
- 606 4. More M, Gutiérrez G, Rothschild M, Bertolini F, Ponce de León FA. Evaluation of SNP  
607 Genotyping in Alpacas Using the Bovine HD Genotyping Beadchip. *Front Genet.*  
608 2019;10: 361. doi:10.3389/fgene.2019.00361
- 609 5. Maresso K, Broeckel U. Genotyping Platforms for Mass-Throughput Genotyping with  
610 SNPs, Including Human Genome-Wide Scans. *Adv Genet.* 2008;60: 107–139.  
611 doi:10.1016/S0065-2660(07)00405-1
- 612 6. LaFramboise T. Single nucleotide polymorphism arrays: a decade of biological,  
613 computational and technological advances. *Nucleic Acids Res.* 2009;37: 4181–93.  
614 doi:10.1093/nar/gkp552
- 615 7. Wang DG, Fan JB, Siao CJ, Berno A, Young P, Sapolsky R, et al. Large-scale  
616 identification, mapping, and genotyping of single-nucleotide polymorphisms in the human

***Mouse single nucleotide polymorphic targets for cross hybridization in rodents***

- 617 genome. *Science*. 1998;280: 1077–82. doi:10.1126/science.280.5366.1077
- 618 8. Xia W, Luo T, Zhang W, Mason AS, Huang D, Huang X, et al. Development of High-  
619 Density SNP Markers and Their Application in Evaluating Genetic Diversity and  
620 Population Structure in *Elaeis guineensis*. *Front Plant Sci*. 2019;10: 130.  
621 doi:10.3389/fpls.2019.00130
- 622 9. Kharzinova VR, Sermyagin AA, Gladyr EA, Okhlopkov IM, Brem G, Zinovieva NA. A  
623 study of applicability of SNP chips developed for bovine and ovine species to whole-  
624 genome analysis of reindeer *rangifer tarandus*. *J Hered*. 2015;106: 758–761.  
625 doi:10.1093/jhered/esv081
- 626 10. Miller JM, Kijas JW, Heaton MP, McEwan JC, Coltman DW. Consistent divergence times  
627 and allele sharing measured from cross-species application of SNP chips developed for  
628 three domestic species. *Mol Ecol Resour*. 2012;12: 1145–1150. doi:10.1111/1755-  
629 0998.12017
- 630 11. Miller JM, Festa-Bianchet M, Coltman DW. Genomic analysis of morphometric traits in  
631 bighorn sheep using the Ovine Infinium® HD SNP BeadChip. *PeerJ*. 2018;6: e4364.  
632 doi:10.7717/peerj.4364
- 633 12. Moravcikova N, Kirchner R, Sidlova V, Kasarda R, Trakovicka A. Estimation of genomic  
634 variation in cervids using cross-species application of SNP arrays.  
635 *Poljoprivreda/Agriculture*. 2015;21: 33–36. doi:10.18047/poljo.21.1.sup.6
- 636 13. Pertoldi C, Wójcik JM, Tokarska M, Kawalko A, Kristensen TN, Loeschcke V, et al.  
637 Genome variability in European and American bison detected using the BovineSNP50  
638 BeadChip. *Conserv Genet*. 2010;11: 627–634. doi:10.1007/s10592-009-9977-y
- 639 14. vonHoldt BM, Pollinger JP, Lohmueller KE, Han E, Parker HG, Quignon P, et al.  
640 Genome-wide SNP and haplotype analyses reveal a rich history underlying dog  
641 domestication. *Nature*. 2010;464: 898–902. doi:10.1038/nature08837
- 642 15. Aslam ML, Bastiaansen JW, Elferink MG, Megens H-J, Crooijmans RP, Blomberg L, et  
643 al. Whole genome SNP discovery and analysis of genetic diversity in Turkey (*Meleagris*  
644 *gallopavo*). *BMC Genomics*. 2012;13: 391. doi:10.1186/1471-2164-13-391
- 645 16. McCue ME, Bannasch DL, Petersen JL, Gurr J, Bailey E, Binns MM, et al. A high density  
646 SNP array for the domestic horse and extant *Perissodactyla*: Utility for association  
647 mapping, genetic diversity, and phylogeny studies. *PLoS Genet*. 2012;8.  
648 doi:10.1371/journal.pgen.1002451
- 649 17. Minias P, Dunn PO, Whittingham LA, Johnson JA, Oyler-McCance SJ. Evaluation of a  
650 Chicken 600K SNP genotyping array in non-model species of grouse. *Sci Rep*. 2019;9: 1–  
651 10. doi:10.1038/s41598-019-42885-5
- 652 18. Harris SE, Munshi-South J, Obergfell C, Neill O. Signatures of Rapid Evolution in Urban  
653 and Rural Transcriptomes of White-Footed Mice (*Peromyscus leucopus*) in the New York

***Mouse single nucleotide polymorphic targets for cross hybridization in rodents***

- 654 Metropolitan Area. PLoS One. 2013;8: 74938. doi:10.1371/journal.pone.0074938
- 655 19. Williams LM, Ma X, Boyko AR, Bustamante CD, Oleksiak MF. SNP identification,  
656 verification, and utility for population genetics in a non-model genus. BMC Genet.  
657 2010;11: 32. doi:10.1186/1471-2156-11-32
- 658 20. Hulme-Beaman A, Dobney K, Cucchi T, Searle JB. An Ecological and Evolutionary  
659 Framework for Commensalism in Anthropogenic Environments. Trends Ecol Evol.  
660 2016;31: 633–645. doi:10.1016/j.tree.2016.05.001
- 661 21. Rodríguez-Estival J, Smits JEG. Small mammals as sentinels of oil sands related  
662 contaminants and health effects in northeastern Alberta, Canada. Ecotoxicol Environ Saf.  
663 2016;124: 285–295. doi:10.1016/j.ecoenv.2015.11.001
- 664 22. Bedford NL, Hoekstra HE. *Peromyscus* mice as a model for studying natural variation.  
665 Elife. 2015;4: 1–13. doi:10.7554/eLife.06813
- 666 23. Vrana PB, Shorter KR, Szalai G, Felder MR, Crossland JP, Veres M, et al. *Peromyscus*  
667 (deer mice) as developmental models. Wiley Interdiscip Rev Dev Biol. 2014;3: 211–230.  
668 doi:10.1002/wdev.132
- 669 24. Yang H, Ding Y, Hutchins LN, Szatkiewicz J, Bell TA, Paigen BJ, et al. A customized  
670 and versatile high-density genotyping array for the mouse. Nat Methods. 2009;6: 663–  
671 666. doi:10.1038/nmeth.1359
- 672 25. Locke MEO, Milojevic M, Eitutus ST, Patel N, Wishart AE, Daley M, et al. Genomic copy  
673 number variation in *Mus musculus*. Additional file 1. BMC Genomics. 2015;16: 497.  
674 doi:10.1186/s12864-015-1713-z
- 675 26. Didion JP, Yang H, Sheppard K, Fu C-P, McMillan L, de Villena F, et al. Discovery of  
676 novel variants in genotyping arrays improves genotype retention and reduces  
677 ascertainment bias. BMC Genomics. 2012;13: 34. doi:10.1186/1471-2164-13-34
- 678 27. Hedges SB, Marin J, Suleski M, Paymer M, Kumar S. Tree of life reveals clock-like  
679 speciation and diversification. Mol Biol Evol. 2015;32: 835–845.  
680 doi:10.1093/molbev/msv037
- 681 28. Geraldès A, Basset P, Smith KL, Nachman MW. Higher differentiation among subspecies  
682 of the house mouse (*Mus musculus*) in genomic regions with low recombination. Mol  
683 Ecol. 2012;20: 4722–4736. doi:10.1111/j.1365-294X.2011.05285.x
- 684 29. Kouassi SK, Nicolas V, Aniskine V, Lalis A, Cruaud C, Couloux A, et al. Taxonomy and  
685 biogeography of the African Pygmy mice, Subgenus *Nannomys* (Rodentia, Murinae, *Mus*)  
686 in Ivory Coast and Guinea (West Africa). Mammalia. 2008;72: 237–252.  
687 doi:10.1515/MAMM.2008.035
- 688 30. Gascuel O. BIONJ: an improved version of the NJ algorithm based on a simple model of  
689 sequence data. Mol Biol Evol. 1997;14: 685–695.



***Mouse single nucleotide polymorphic targets for cross hybridization in rodents***

- 690           doi:10.1093/oxfordjournals.molbev.a025808
- 691   31.   Khiste N, Ilie L. E-MEM: efficient computation of maximal exact matches for very large  
692       genomes. *Bioinformatics*. 2015;31: 509–514. doi:10.1093/bioinformatics/btu687
- 693   32.   Vonholdt BM, Pollinger JP, Lohmueller KE, Han E, Parker HG, Quignon P, et al.  
694       Genome-wide SNP and haplotype analyses reveal a rich history underlying dog  
695       domestication. *Nature*. 2010;464: 898–902. doi:10.1038/nature08837
- 696   33.   Haynes GD, Latch EK. Identification of Novel Single Nucleotide Polymorphisms (SNPs)  
697       in Deer (*Odocoileus* spp.) Using the BovineSNP50 BeadChip. Breuker C, editor. *PLoS*  
698       *One*. 2012;7: e36536. doi:10.1371/journal.pone.0036536
- 699   34.   Michelizzi VN, Wu X, Dodson M V, Michal JJ, Zambrano-Varon J, McLean DJ, et al. A  
700       global view of 54,001 single nucleotide polymorphisms (SNPs) on the Illumina  
701       BovineSNP50 BeadChip and their transferability to water buffalo. *Int J Biol Sci*. 2010;7:  
702       18–27. doi:10.7150/ijbs.7.18
- 703   35.   Williams LM, Ma X, Boyko AR, Bustamante CD, Oleksiak MF. SNP identification,  
704       verification, and utility for population genetics in a non-model genus. *BMC Genet*.  
705       2010;11: 32. doi:10.1186/1471-2156-11-32
- 706   36.   Binder H, Preibisch S. Specific and nonspecific hybridization of oligonucleotide probes on  
707       microarrays. *Biophys J*. 2005;89: 337–52. doi:10.1529/biophysj.104.055343
- 708   37.   Miclaus K, Wolfinger R, Vega S, Chierici M, Furlanello C, Lambert C, et al. Batch effects  
709       in the BRLMM genotype calling algorithm influence GWAS results for the Affymetrix  
710       500K array. *Pharmacogenomics J*. 2010;10: 336–46. doi:10.1038/tpj.2010.36
- 711   38.   Hong H, Su Z, Ge W, Shi L, Perkins R, Fang H, et al. Assessing batch effects of genotype  
712       calling algorithm BRLMM for the Affymetrix GeneChip Human Mapping 500 K array set  
713       using 270 HapMap samples. 2008; doi:10.1186/1471-2105-9-S9-S17
- 714   39.   Akey JM. The Effect of Single Nucleotide Polymorphism Identification Strategies on  
715       Estimates of Linkage Disequilibrium. *Mol Biol Evol*. 2003;20: 232–242.  
716       doi:10.1093/molbev/msg032
- 717   40.   Zhang P, Zhan X, Rosenberg NA, Zöllner S. Genotype Imputation Reference Panel  
718       Selection Using Maximal Phylogenetic Diversity. 2013; doi:10.1534/genetics.113.154591
- 719   41.   Huang L, Jakobsson M, Pemberton TJ, Ibrahim M, Nyambo T, Omar S, et al. Haplotype  
720       variation and genotype imputation in African populations. *Genet Epidemiol*. 2011;35:  
721       766–80. doi:10.1002/gepi.20626
- 722   42.   Zhao S, Jing W, Samuels DC, Sheng Q, Shyr Y, Guo Y. Strategies for processing and  
723       quality control of Illumina genotyping arrays. *Brief Bioinform*. 2018;19: 765–775.  
724       doi:10.1093/bib/bbx012

## *Mouse single nucleotide polymorphic targets for cross hybridization in rodents*

- 725 43. Rodríguez-Estival J, Smits JEG. Small mammals as sentinels of oil sands related  
726 contaminants and health effects in northeastern Alberta, Canada. *Ecotoxicol Environ Saf.*  
727 2016;124: 285–295. doi:10.1016/J.ECOENV.2015.11.001
- 728 44. Ramsdell CM, Lewandowski AA, Glenn J, Vrana PB, O’Neill RJ, Dewey MJ.  
729 Comparative genome mapping of the deer mouse (*Peromyscus maniculatus*) reveals  
730 greater similarity to rat (*Rattus norvegicus*) than to the lab mouse (*Mus musculus*). *BMC*  
731 *Evol Biol.* 2008;8: 65. doi:10.1186/1471-2148-8-65

732

733

### 734 **Supporting Information**

735 **S1 Fig. Abnormalities in two MDGA raw intensity CEL file images.** CEL file raw array  
736 intensity images were analyzed for quality control purposes and abnormalities in array images  
737 were noted for two CEL files. The two samples were not removed from analysis.

738

739 **S1 Table. Forty-four MDGA data (CEL) files of the present study.** <sup>1</sup>MDGA data (CEL) files  
740 were downloaded from the Center for Genome Dynamics at the Jackson Laboratory, with the  
741 exception of the four *H. glaber* CEL files (generated in-house). <sup>2</sup>Divergence time is given in  
742 millions of years from the reference house mouse, *M. musculus* (timetree.org). <sup>3</sup>“redo” files are a  
743 technical replicate of the CEL file with the same sample identifier code. Ex: SNP\_mDIV\_D3-  
744 639\_101509-redo is a technical replicate of SNP\_mDIV\_D3-639\_91809, where D3-639 is the  
745 sample identifier. <sup>4</sup>Only family level information available for CEL file SNP\_mDIV\_B9-  
746 667\_102109; Genus and species of sample are unknown.

747

748 **S2 Table. Training set of samples for genotyping algorithm (n=114).** CEL files of 114  
749 classically inbred laboratory mouse strains were downloaded from the Jackson Laboratory  
750 Center for Genome Dynamics for genotyping algorithm training.

751

752 **S3 Table. Genotype summary of 44 study samples genotyped at 493,290 single nucleotide**  
753 **polymorphic loci located across the genome of *Mus musculus*.** Genotyping summary results  
754 for all 44 Mouse Diversity Genotyping Array data files.

755

756 **S4 Table. Study species evaluated with publicly available nuclear genome sequence**  
757 **information.** Genomes accessed through the NCBI Genomes FTP site of samples under study  
758 (<ftp.ncbi.nlm.nih.gov/genomes/>).

759

760

761

762

763

## Mouse single nucleotide polymorphic targets for cross hybridization in rodents

764 **Figures**

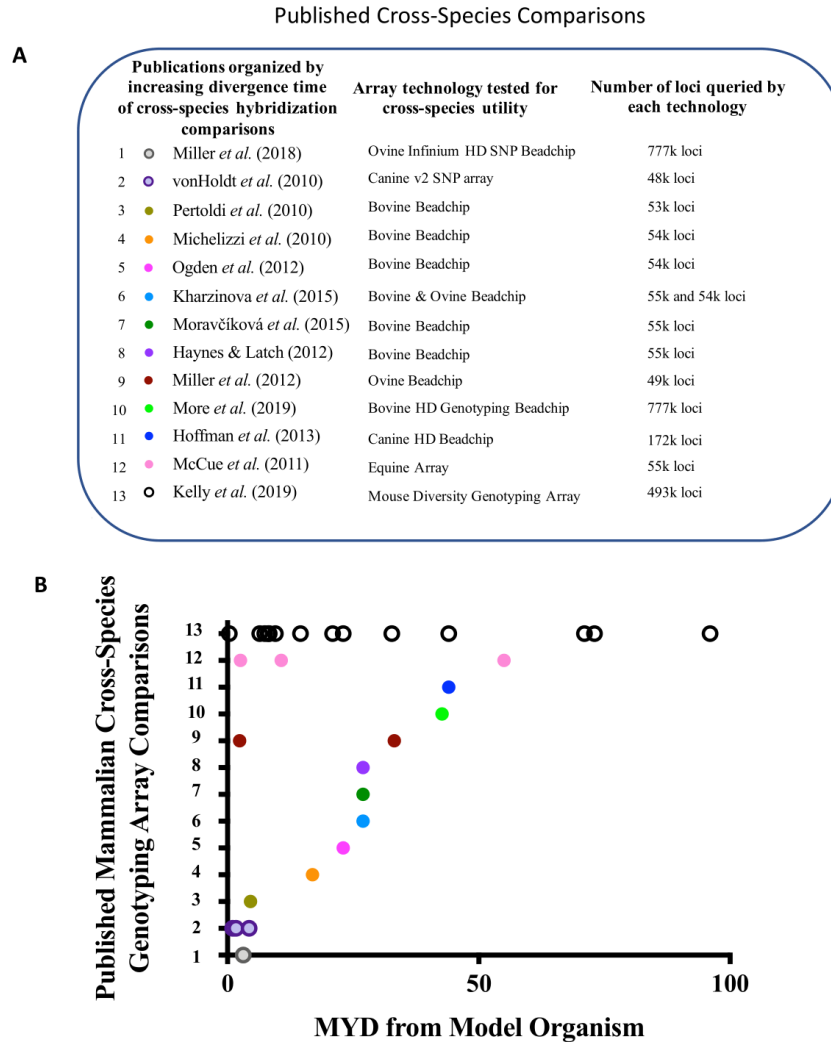

765

766 **Fig 1. Summary of published research on mammalian cross-species genotyping using SNP**  
 767 **genotyping microarrays**

768 (A) Published research is organized in increasing order of genetic divergence in millions of years  
 769 divergence (MYD) of non-model test samples from the model reference organism. Authors,  
 770 publication year, genotyping microarray technology, and approximate number of loci queried (in  
 771 thousands) are listed for each publication. (B) The sample of publications on mammalian cross-  
 772 species array studies with the 13<sup>th</sup> representing the contributions of this thesis to the cross-species  
 773 genotyping array field.

774

## Mouse single nucleotide polymorphic targets for cross hybridization in rodents

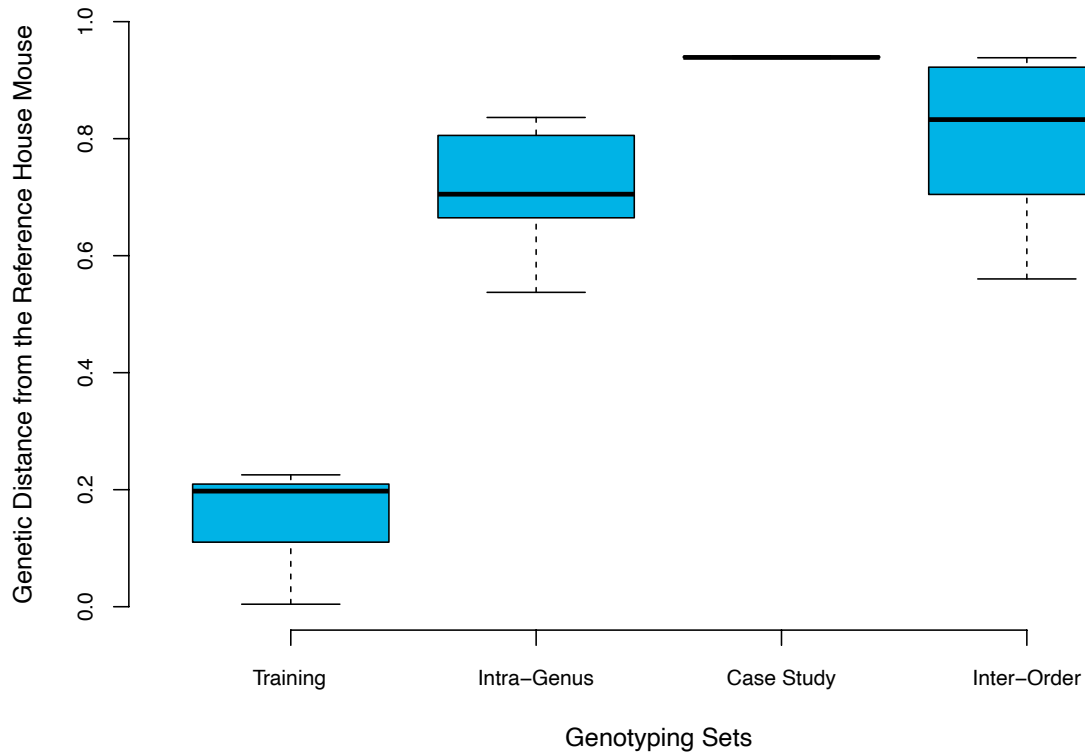

775

776

**Fig 2. Genetic diversity of test sets exceeds maximum genetic diversity of training set**

777

Boxplots representing the minimum, first quartile, median, third quartile, and maximum genetic

778

distances for the training set (n=114), intra-genus test set (n=27), case study of *Peromyscus*

779

(n=7), and inter-order test set (n=44). All genetic distances are with respect to the reference

780

house mouse *Mus musculus*.

781

782

783

*Mouse single nucleotide polymorphic targets for cross hybridization in rodents*

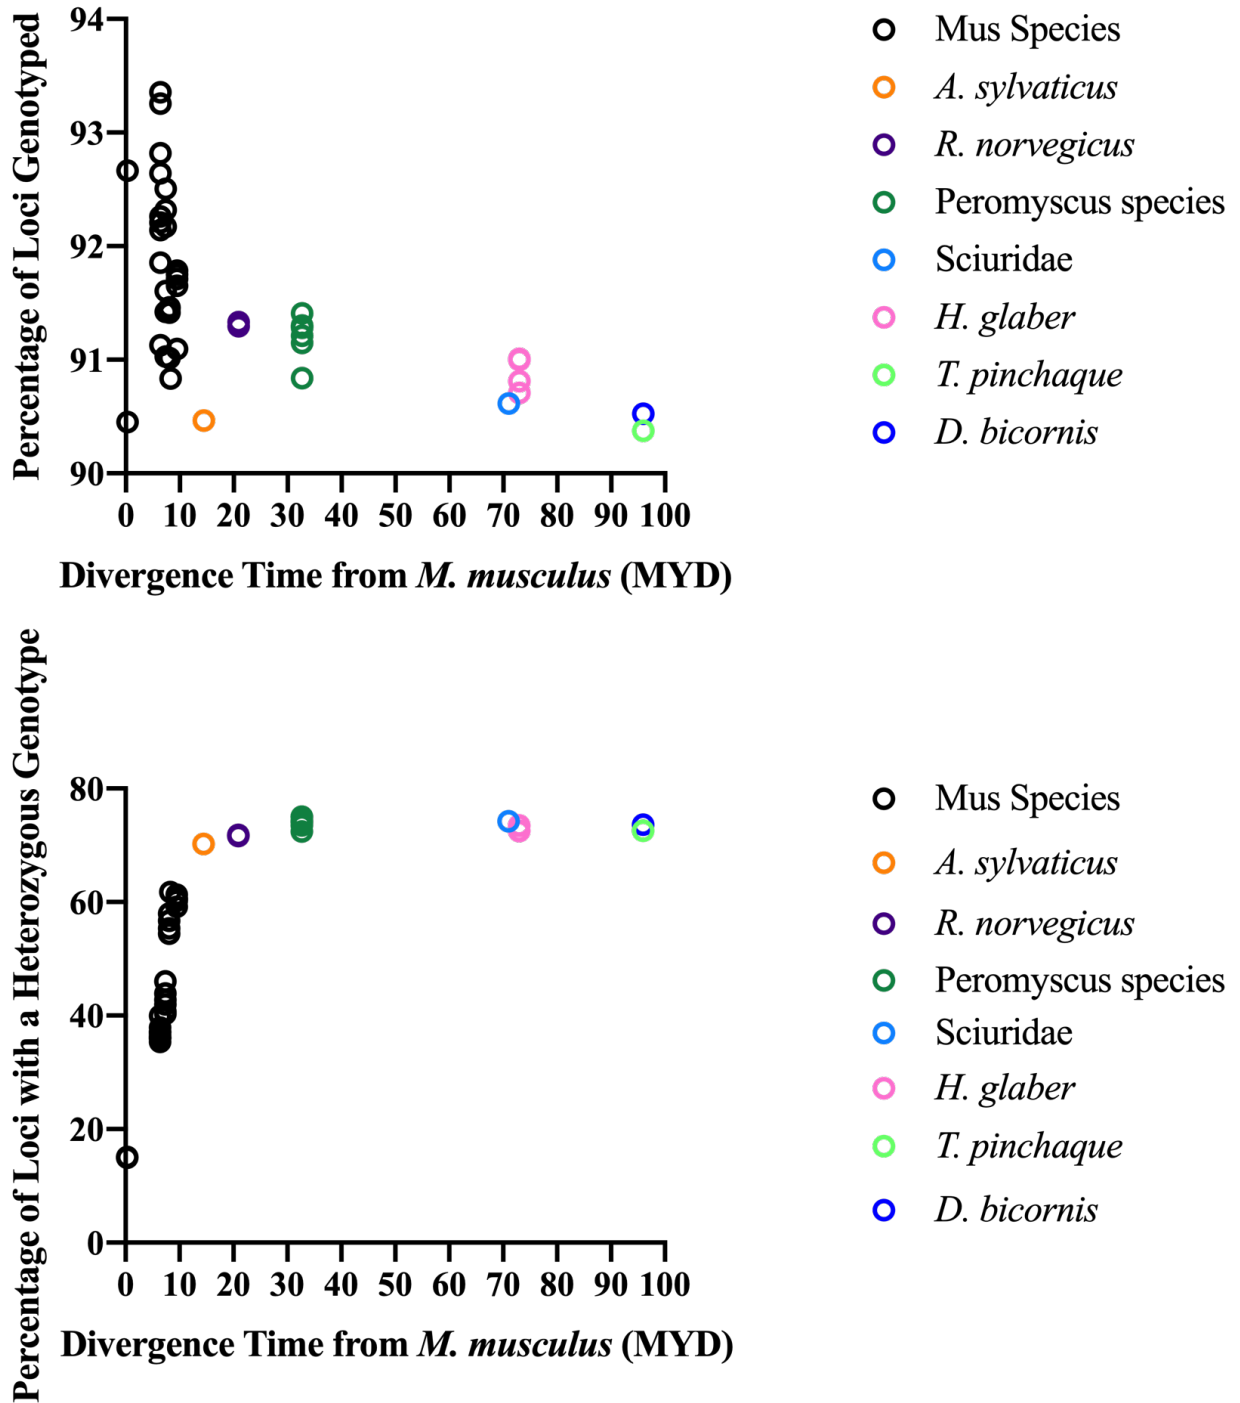

**Fig 3. Underestimation of genetic diversity for highly diverged species in cross-species genotyping**

(A) The percentage of loci genotyped from the inter-order test set (n=44). (B) The percentage of loci from the inter-order test set with a heterozygous genotype call. MYD = Millions of years divergence, with respect to the reference *Mus musculus*.

*Mouse single nucleotide polymorphic targets for cross hybridization in rodents*

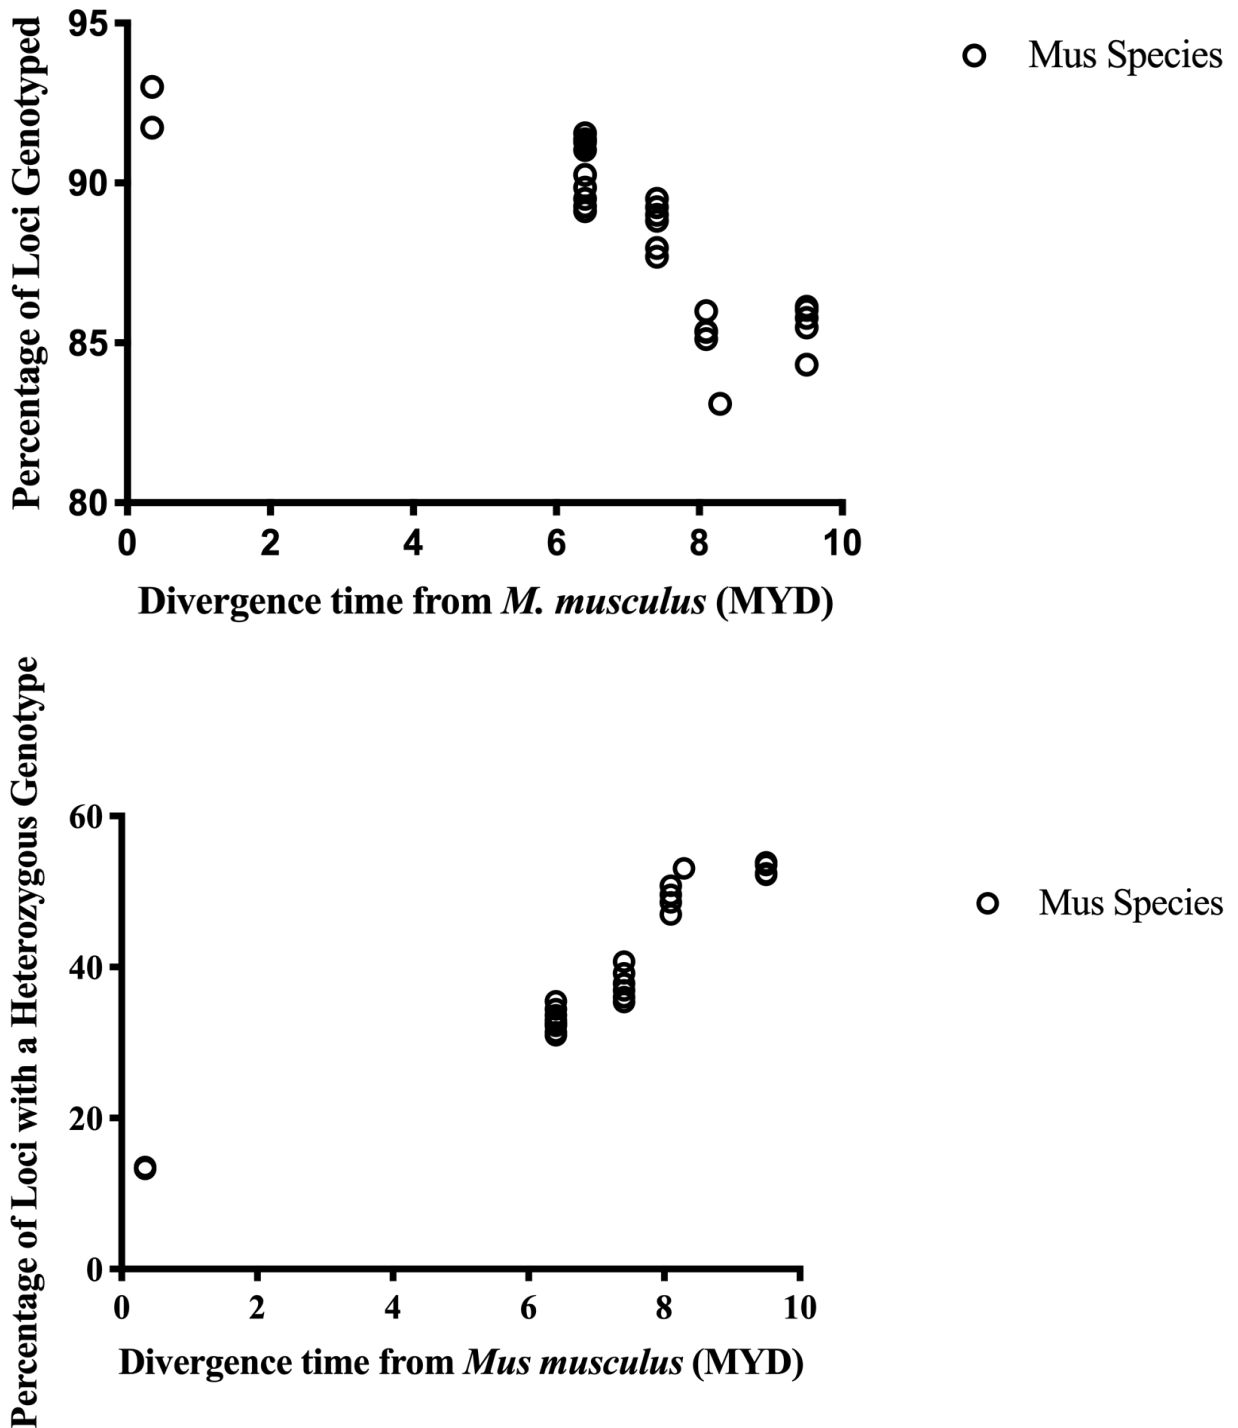

793

794

795

796 **Fig 4. Genetic diversity of wild *Mus* species**

797 (A) The percentage of loci genotyped from the intra-genus test set (n=27). (B) The percentage of

798 loci from the intra-genus test set with a heterozygous genotype call. MYD = Millions of years

799 divergence, with respect to the reference *Mus musculus*.

800

801

### Mouse single nucleotide polymorphic targets for cross hybridization in rodents

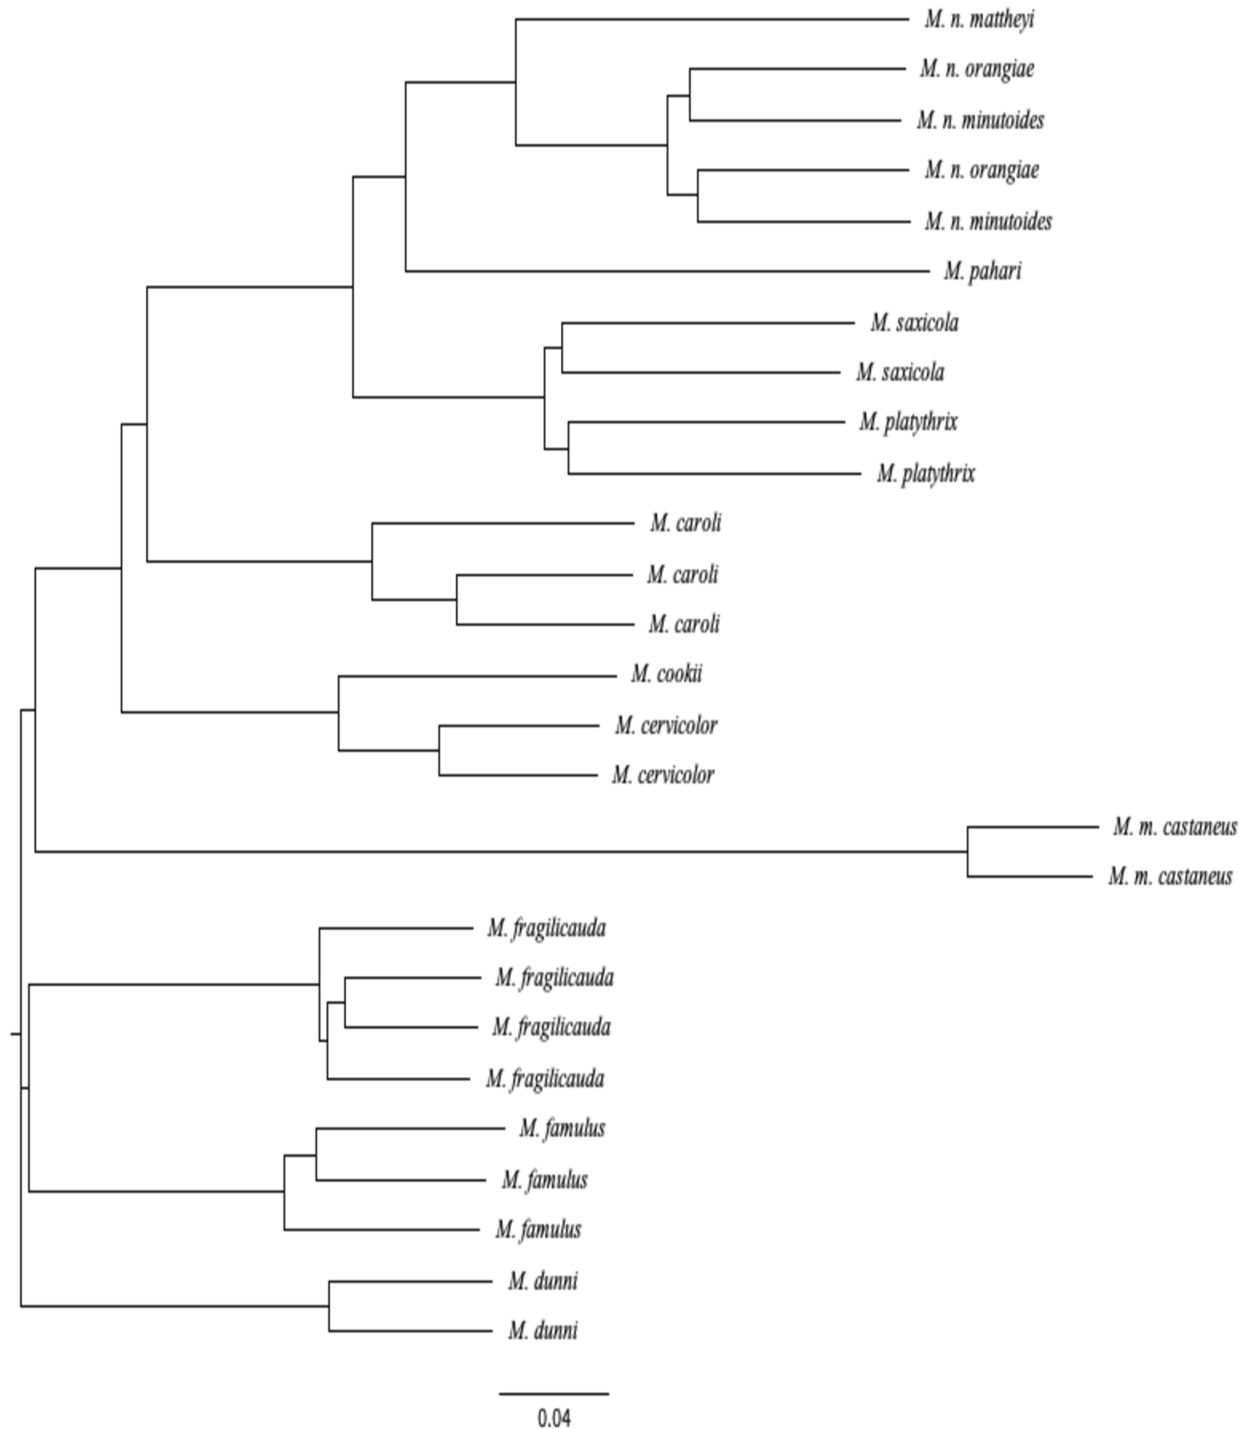

802

803

804

#### **Fig 5. SNP distance-based tree of genetic relatedness reflects known taxonomic relationships between *Mus* species**

805

SNP distance-based tree of genetic relatedness of samples from the intra-genus test set (n = 27).

806

At 9.5 MYD a pygmy mouse subspecies *M. n. orangiae* has SNP-based genetic distances that

807

reflect greater genetic similarity to another pygmy mouse subspecies *M. n. minutoides* than the

808

replicate MDGA data file of the same *M. n. orangiae* sample. MYD = Millions of years

809

divergence, with respect to the reference *Mus musculus*.

**Mouse single nucleotide polymorphic targets for cross hybridization in rodents**

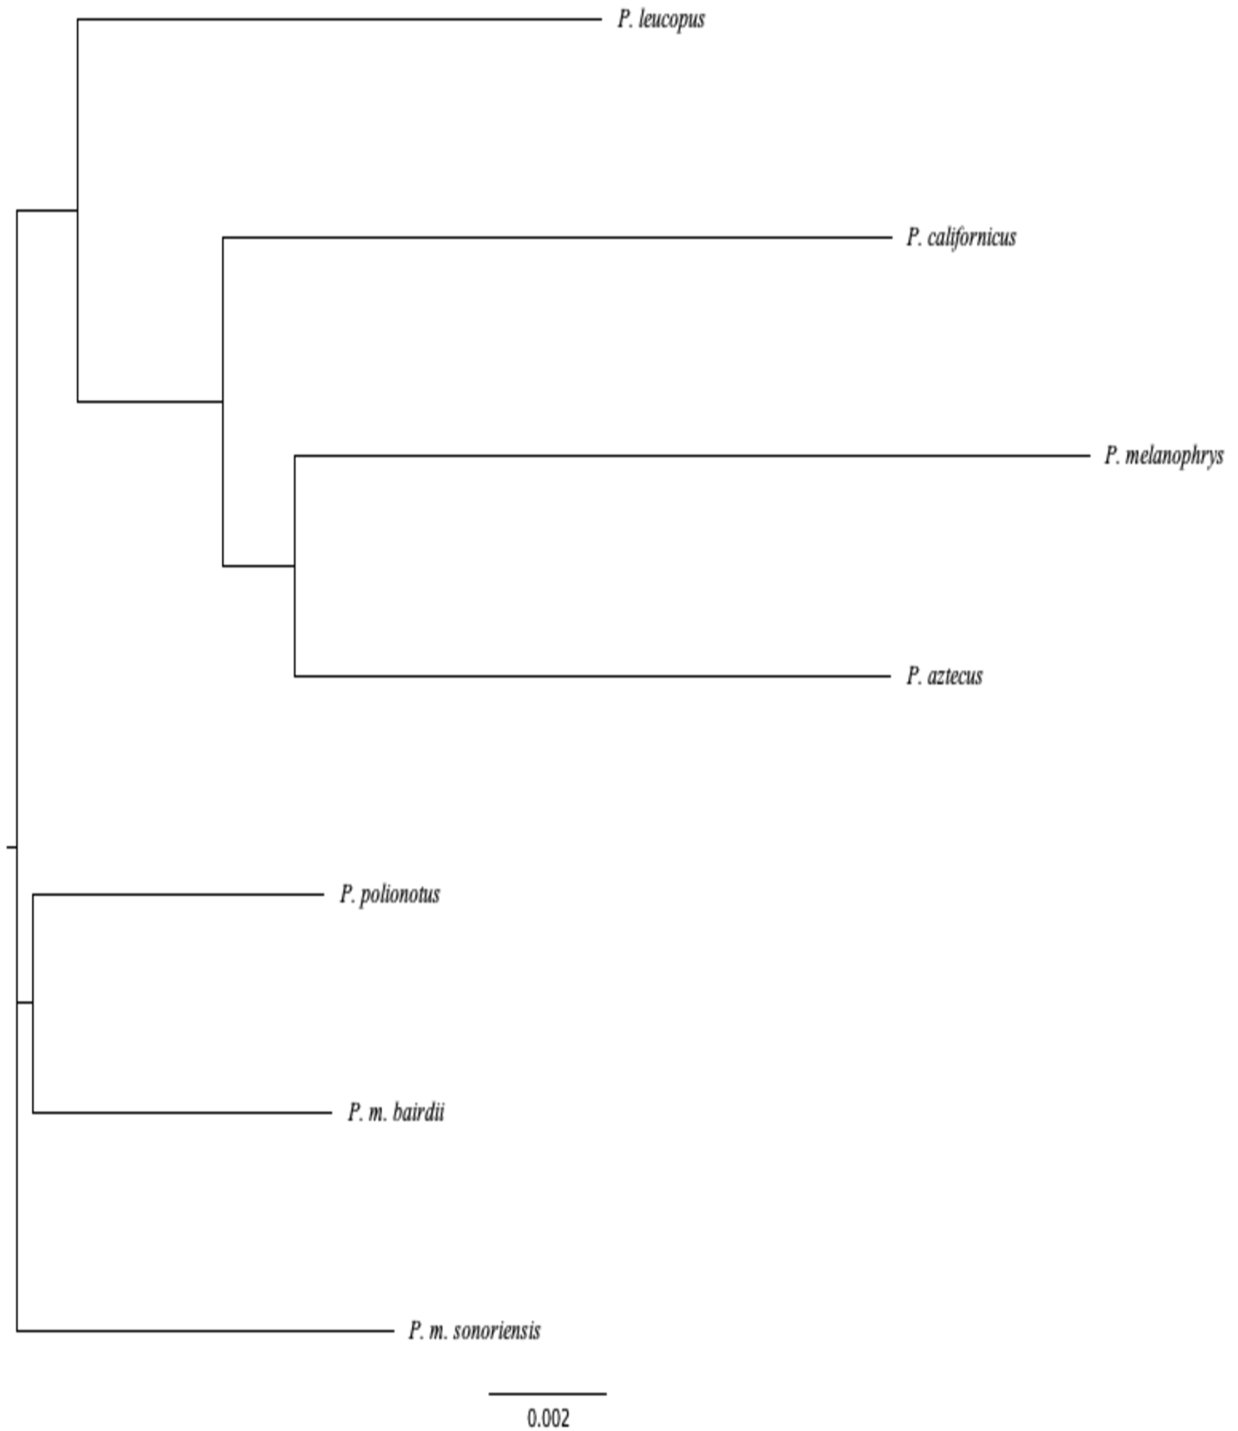

810

811 **Fig 6. SNP distance-based tree of genetic relatedness reflects known taxonomic**  
812 **relationships between Peromyscus species**

813 Pairwise SNP distance-based tree of genetic relatedness of samples from the intra-genus test set  
814 of *Peromyscus* species (n=7).

815

816

817



**Mouse single nucleotide polymorphic targets for cross hybridization in rodents**

818 **Supporting Information**  
819

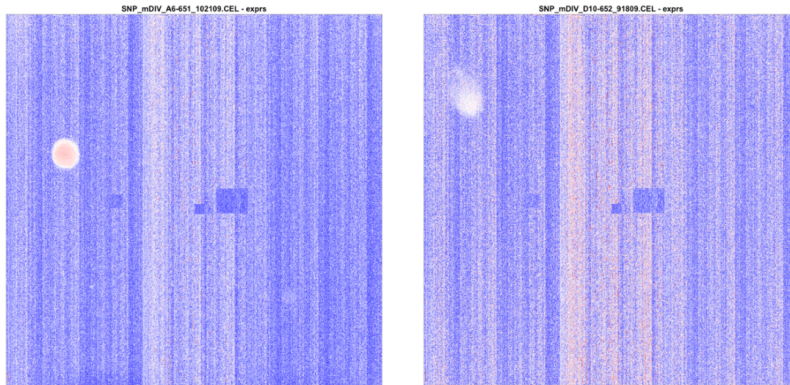

820  
821 **S1 Fig. Abnormalities in two MDGA raw intensity CEL file images.** CEL file raw array  
822 intensity images were analyzed for quality control purposes and abnormalities in array images  
823 were noted for two CEL files. The two samples were not removed from analysis.

824  
825 **S1 Table. Forty-four MDGA data (CEL) files of the present study.**

| CEL File <sup>1</sup>                    | Sex of Organism | Common Name                    | Scientific Name               | Divergence Time <sup>2</sup> from <i>Mus musculus</i> (MYD) |
|------------------------------------------|-----------------|--------------------------------|-------------------------------|-------------------------------------------------------------|
| SNP_mDIV_A7-7_081308.CEL                 | Male            | House Mouse Reference          | <i>Mus musculus</i>           | 0                                                           |
| SNP_mDIV_D3-639_101509-redo <sup>3</sup> | Female          | Southeastern Asian House Mouse | <i>Mus musculus castaneus</i> | 0.35                                                        |
| SNP_mDIV_D3-639_91809                    | Female          | Southeastern Asian House Mouse | <i>Mus musculus castaneus</i> | 0.35                                                        |
| SNP_mDIV_D9-647_101509-redo              | Male            | Earth-Colored Mouse            | <i>Mus dunni</i>              | 6.4                                                         |
| SNP_mDIV_D9-647_91809                    | Male            | Earth-Colored Mouse            | <i>Mus dunni</i>              | 6.4                                                         |
| SNP_mDIV_D4-640_101509-redo              | Male            | Servant Mouse                  | <i>Mus famulus</i>            | 6.4                                                         |
| SNP_mDIV_D4-640_91809                    | Male            | Servant Mouse                  | <i>Mus famulus</i>            | 6.4                                                         |

***Mouse single nucleotide polymorphic targets for cross hybridization in rodents***

|                              |      |                     |                                |      |
|------------------------------|------|---------------------|--------------------------------|------|
| SNP_mDIV_D8-474_012209       | Male | Servant Mouse       | <i>Mus famulus</i>             | 6.4  |
| SNP_mDIV_D5-642_101509-redo  | Male | Sheath-Tailed Mouse | <i>Mus fragilicauda</i>        | 6.4  |
| SNP_mDIV_D5-642_91809        | Male | Sheath-Tailed Mouse | <i>Mus fragilicauda</i>        | 6.4  |
| SNP_mDIV_D6-643_101509-redo  | Male | Sheath-Tailed Mouse | <i>Mus fragilicauda</i>        | 6.4  |
| SNP_mDIV_D6-643_91809        | Male | Sheath-Tailed Mouse | <i>Mus fragilicauda</i>        | 6.4  |
| SNP_mDIV_D7-644_101509-redo  | Male | Ryukyu Mouse        | <i>Mus caroli</i>              | 7.41 |
| SNP_mDIV_D7-644_91809        | Male | Ryukyu Mouse        | <i>Mus caroli</i>              | 7.41 |
| SNP_mDIV_D6-472_012209       | Male | Ryukyu Mouse        | <i>Mus caroli</i>              | 7.41 |
| SNP_mDIV_D8-646_101509-redo  | Male | Fawn-Coloured Mouse | <i>Mus cervicolor</i>          | 7.41 |
| SNP_mDIV_D8-646_91809        | Male | Fawn-Coloured Mouse | <i>Mus cervicolor</i>          | 7.41 |
| SNP_mDIV_A2-645_102109       | Male | Cook's Mouse        | <i>Mus cookii</i>              | 7.41 |
| SNP_mDIV_A3-648_102109       | Male | Flat-Haired Mouse   | <i>Mus platythrix</i>          | 8.1  |
| SNP_mDIV_A4-649_102109       | Male | Flat-Haired Mouse   | <i>Mus platythrix</i>          | 8.1  |
| SNP_mDIV_A5-650_102109       | Male | Rock-Loving Mouse   | <i>Mus saxicola</i>            | 8.1  |
| SNP_mDIV_A6-651_102109       | Male | Rock-Loving Mouse   | <i>Mus saxicola</i>            | 8.1  |
| SNP_mDIV_D7-473_012209       | Male | Shrew Mouse         | <i>Mus pahari</i>              | 8.29 |
| SNP_mDIV_D11-653_101509-redo | Male | African Pygmy Mouse | <i>Mus nannomys minutoides</i> | 9.5  |
| SNP_mDIV_D11-653_91809       | Male | African Pygmy Mouse | <i>Mus nannomys minutoides</i> | 9.5  |

**Mouse single nucleotide polymorphic targets for cross hybridization in rodents**

|                                      |        |                                 |                                                   |      |
|--------------------------------------|--------|---------------------------------|---------------------------------------------------|------|
| SNP_mDIV_D10<br>-652_101509-<br>redo | Male   | Orange Mouse                    | <i>Mus nannomys<br/>orangiae</i>                  | 9.5  |
| SNP_mDIV_D10<br>-652_91809           | Male   | Orange Mouse                    | <i>Mus nannomys<br/>orangiae</i>                  | 9.5  |
| SNP_mDIV_A7-<br>654_102109           | Male   | Matthey's<br>Mouse              | <i>Mus nannomys<br/>mattheyi</i>                  | 9.5  |
| SNP_mDIV_B8-<br>1190_082410          | Male   | Wood Mouse                      | <i>Apodemus<br/>sylvaticus</i>                    | 14.5 |
| SNP_mDIV_A9-<br>656_102109           | Male   | Sprague<br>Dawley rat           | <i>Rattus<br/>norvegicus</i>                      | 20.9 |
| SNP_mDIV_A10<br>-657_102109          | Male   | Outbred Wistar<br>rat           | <i>Rattus<br/>norvegicus</i>                      | 20.9 |
| SNP_mDIV_B1-<br>659_102109           | Male   | Aztec Mouse                     | <i>Peromyscus<br/>aztecus</i>                     | 32.7 |
| SNP_mDIV_B3-<br>661_102109           | Male   | California<br>Mouse             | <i>Peromyscus<br/>californicus</i>                | 32.7 |
| SNP_mDIV_B5-<br>663_102109           | Male   | North<br>American Deer<br>Mouse | <i>Peromyscus<br/>maniculatus<br/>bairdii</i>     | 32.7 |
| SNP_mDIV_B4-<br>662_102109           | Male   | Sonoran Deer<br>Mouse           | <i>Peromyscus<br/>maniculatus<br/>sonoriensis</i> | 32.7 |
| SNP_mDIV_B2-<br>660_102109           | Male   | Plateau Deer<br>Mouse           | <i>Peromyscus<br/>melanophrys</i>                 | 32.7 |
| SNP_mDIV_B6-<br>664_102109           | Male   | Oldfield Mouse                  | <i>Peromyscus<br/>polionotus</i>                  | 32.7 |
| SNP_mDIV_B8-<br>666_102109           | Male   | White-Footed<br>Mouse           | <i>Peromyscus<br/>leucopus</i>                    | 32.7 |
| SNP_mDIV_B9-<br>667_102109           | Male   | Squirrel                        | Sciuridae <sup>4</sup>                            | 71   |
| DNA3337                              | Female | Naked Mole<br>Rat               | <i>Heterocephalus<br/>glaber</i>                  | 73   |
| DNA3338                              | Female | Naked Mole<br>Rat               | <i>Heterocephalus<br/>glaber</i>                  | 73   |
| DNA3339                              | Male   | Naked Mole<br>Rat               | <i>Heterocephalus<br/>glaber</i>                  | 73   |

**Mouse single nucleotide polymorphic targets for cross hybridization in rodents**

|                                                       |      |                     |                              |    |
|-------------------------------------------------------|------|---------------------|------------------------------|----|
| DNA3340                                               | Male | Naked Mole Rat      | <i>Heterocephalus glaber</i> | 73 |
| SNP_A2-<br>GES11_4907_AG<br>T-JLP-120115-<br>24-35517 | Male | African Black Rhino | <i>Diceros bicornis</i>      | 96 |
| SNP_A1-<br>GES11_4902_AG<br>T-JLP-120115-<br>24-35517 | Male | Mountain Tapir      | <i>Tapirus pinchaque</i>     | 96 |

826 <sup>1</sup>MDGA data (CEL) files were downloaded from the Center for Genome Dynamics at the  
827 Jackson Laboratory, with the exception of the four *H. glaber* CEL files (generated in-house).  
828 <sup>2</sup>Divergence time is given in millions of years from the reference house mouse, *M. musculus*  
829 (timetree.org). <sup>3</sup>“redo” files are a technical replicate of the CEL file with the same sample  
830 identifier code. Ex: SNP\_mDIV\_D3-639\_101509-redo is a technical replicate of  
831 SNP\_mDIV\_D3-639\_91809, where D3-639 is the sample identifier. <sup>4</sup>Only family level  
832 information available for CEL file SNP\_mDIV\_B9-667\_102109; Genus and species of sample  
833 are unknown.

834

835

**S2 Table. Training set of samples for genotyping algorithm (n=114).**

| 114 training set CEL file names | Sample name                       | Sex |
|---------------------------------|-----------------------------------|-----|
| SNP_mDIV_B3-387_022709.CEL      | 129P1/ReJ                         | M   |
| SNP_mDIV_B4-388_012709.CEL      | 129P3/J                           | M   |
| SNP_mDIV_A1-1_081308.CEL        | 129S1/SvImJ                       | M   |
| SNP_mDIV_A8-199_091708.CEL      | 129S6                             | M   |
| SNP_mDIV_B5-389_012709.CEL      | 129T2/SvEmsJ                      | M   |
| SNP_mDIV_D6-254_111308.CEL      | 129X1/SvJ                         | M   |
| SNP_mDIV_A2-2_081308.CEL        | A/J                               | M   |
| SNP_mDIV_B7-391_012709.CEL      | A/WySnJ                           | M   |
| SNP_mDIV_B4-118_091708.CEL      | AEJ/GnLeJ                         | M   |
| SNP_mDIV_B8-392_012709.CEL      | AEJ/GnRk                          | M   |
| SNP_mDIV_A3-3_081308.CEL        | AKR/J                             | M   |
| SNP_mDIV_A6-119_090908.CEL      | ALR/LtJ                           | M   |
| SNP_mDIV_C9-120_090908.CEL      | ALS/LtJ                           | M   |
| SNP_mDIV_A4-4_081308.CEL        | BALB/cByJ                         | M   |
| SNP_mDIV_D5-253_111308.CEL      | BALB/cJ                           | M   |
| SNP_mDIV_B9-393_012709.CEL      | BDP/J                             | M   |
| SNP_mDIV_B5-123_091708.CEL      | BPH/2J                            | M   |
| SNP_mDIV_B3-316_120908.CEL      | BPL/1J                            | M   |
| SNP_mDIV_B6-124_091708.CEL      | BPN/3J                            | M   |
| SNP_mDIV_A5-5_081308.CEL        | BTBR T<+> Itpr3<tf>-Fbxl3<Ovtm>/J | M   |

***Mouse single nucleotide polymorphic targets for cross hybridization in rodents***

|                                        |                                                    |   |
|----------------------------------------|----------------------------------------------------|---|
| SNP_mDIV_C11-125_090908.CEL            | BUB/BnJ                                            | M |
| SNP_mDIV_B10-394_012709.CEL            | BXSB/MpJ                                           | M |
| SNP_mDIV_A6-6_081308.CEL               | C3H/HeJ                                            | M |
| SNP_mDIV_D1-126_090908.CEL             | C3HeB/FeJ                                          | M |
| SNP_mDIV_B8-85_090908.CEL              | C57BL/10J                                          | M |
| SNP_mDIV_A5-378_121608.CEL             | C57BL/6J                                           | M |
| SNP_mDIV_A1-<br>SNP08_001_103008.CEL   | C57BL/6J                                           | F |
| SNP_mDIV_A2-<br>SNP08_001_103008.CEL   | C57BL/6J                                           | F |
| SNP_mDIV_A3-<br>SNP08_001_103008.CEL   | C57BL/6J                                           | F |
| SNP_mDIV_A4-<br>SNP08_002_103008.CEL   | C57BL/6J                                           | M |
| SNP_mDIV_A5-<br>SNP08_002_103008.CEL   | C57BL/6J                                           | M |
| SNP_mDIV_A6-<br>SNP08_002_103008.CEL   | C57BL/6J                                           | M |
| SNP_mDIV_A7-7_081308.CEL               | C57BL/6J                                           | M |
| SNP_mDIV_A9-382_012709.CEL             | C57BL/6NCI                                         | M |
| SNP_mDIV_B1-385_012709.CEL             | C57BL/6NCI                                         | M |
| SNP_mDIV_A8-381_012709.CEL             | C57BL/6CrI                                         | M |
| SNP_mDIV_A10-<br>SNP08_004_103008.CEL  | C57BL/6NJ                                          | M |
| SNP_mDIV_A11-<br>SNP08_004_103008.CEL  | C57BL/6NJ                                          | M |
| SNP_mDIV_A7-<br>SNP08_003_103008.CEL   | C57BL/6NJ                                          | F |
| SNP_mDIV_A8-<br>SNP08_003_103008.CEL   | C57BL/6NJ                                          | F |
| SNP_mDIV_A9-<br>SNP08_003_103008.CEL   | C57BL/6NJ                                          | F |
| SNP_mDIV_B1-<br>SNP08_004_103008_4.CEL | C57BL/6NJ                                          | M |
| SNP_mDIV_A10-383_012709.CEL            | C57BL/6Tc                                          | M |
| SNP_mDIV_A11-384_012709.CEL            | C57BL/6Tc                                          | M |
| SNP_mDIV_B9-86_090908.CEL              | Wrong sample name (not C57BLKS/J, close to C57L/J) | M |
| SNP_mDIV_D2-<br>SNP09_024_022709.CEL   | C57BLKS/J                                          | M |
| SNP_mDIV_B10-87_090908.CEL             | C57BR/cdJ                                          | M |
| SNP_mDIV_B11-88_090908.CEL             | C57L/J                                             | M |
| SNP_mDIV_C1-89_090908.CEL              | C58/J                                              | M |
| SNP_mDIV_B4-15_081308.CEL              | CBA/CaJ                                            | M |

***Mouse single nucleotide polymorphic targets for cross hybridization in rodents***

|                             |                   |   |
|-----------------------------|-------------------|---|
| SNP_mDIV_D8-256_111308.CEL  | CBA/J             | M |
| SNP_mDIV_D2-128_090908.CEL  | CE/J              | M |
| SNP_mDIV_D3-129_090908.CEL  | CHMU/LeJ          | M |
| SNP_mDIV_B7-18_081308.CEL   | DBA/1J            | M |
| SNP_mDIV_C3-398_012709.CEL  | DBA/1LacJ         | M |
| SNP_mDIV_C4-399_012709.CEL  | DBA/2DeJ          | F |
| SNP_mDIV_C5-400_012709.CEL  | DBA/2HaSmnJ       | M |
| SNP_mDIV_B8-19_081308.CEL   | DBA/2J            | M |
| SNP_mDIV_A8-56_082108.CEL   | DDK/Pas           | F |
| SNP_mDIV_B9-20_081308.CEL   | DDY/JclSidSeyFrkJ | M |
| SNP_mDIV_D4-130_090908.CEL  | DLS/LeJ           | M |
| SNP_mDIV_D5-131_090908.CEL  | EL/SuzSeyFrkJ     | M |
| SNP_mDIV_B10-21_081308.CEL  | FVB/NJ            | M |
| SNP_mDIV_B8-132_091708.CEL  | HPG/BmJ           | M |
| SNP_mDIV_B2-90_091708.CEL   | I/LnJ             | M |
| SNP_mDIV_A11-431_022709.CEL | WSP2              | F |
| SNP_mDIV_A9-429_022709.CEL  | WSR2              | M |
| SNP_mDIV_A8-427_022709.CEL  | COLD2             | M |
| SNP_mDIV_A6-424_022709.CEL  | HOT1              | M |
| SNP_mDIV_A7-425_022709.CEL  | HOT2              | M |
| SNP_mDIV_B2-433_022709.CEL  | ILS/IbgTejJ       | M |
| SNP_mDIV_B1-432_022709.CEL  | ISS/IbgTejJ       | M |
| SNP_mDIV_C2-91_090908.CEL   | JE/LeJ            | M |
| SNP_mDIV_B11-22_081308.CEL  | KK/HIJ            | M |
| SNP_mDIV_C3-92_090908.CEL   | LG/J              | M |
| SNP_mDIV_C4-93_090908.CEL   | LP/J              | M |
| SNP_mDIV_C6-401_012709.CEL  | LT/SvEiJ          | M |
| SNP_mDIV_D7-134_090908.CEL  | MRL/MpJ           | M |
| SNP_mDIV_C6-30_081308.CEL   | NOD/ShiLtJ        | M |
| SNP_mDIV_C9-404_012709.CEL  | NOD/ShiLtJ        | M |
| SNP_mDIV_A2-48_082108.CEL   | NON/ShiLtJ        | M |
| SNP_mDIV_C11-406_012709.CEL | NONcNZO5/LtJ      | M |
| SNP_mDIV_A3-49_082108.CEL   | NOR/LtJ           | M |
| SNP_mDIV_D9-136_090908.CEL  | NU/J              | M |
| SNP_mDIV_A1-50_091708.CEL   | NZB/BINJ          | M |
| SNP_mDIV_C5-94_090908.CEL   | NZL/LtJ           | M |
| SNP_mDIV_D10-137_090908.CEL | NZM2410/J         | M |
| SNP_mDIV_C7-31_081308.CEL   | NZO/HILtJ         | M |
| SNP_mDIV_C8-32_081308.CEL   | NZW/LacJ          | M |
| SNP_mDIV_B9-138_091708.CEL  | P/J               | M |

***Mouse single nucleotide polymorphic targets for cross hybridization in rodents***

|                               |                        |   |
|-------------------------------|------------------------|---|
| SNP_mDIV_C6-95_090908.CEL     | PL/J                   | M |
| SNP_mDIV_A1-147_111308.CEL    | SI/Col Tyrp1 Dnahc11/J | M |
| SNP_mDIV_D11-139_090908.CEL   | PN/nBSwUmabJ           | M |
| SNP_mDIV_B11-141_091708.CEL   | RF/J                   | M |
| SNP_mDIV_B9-142_103008_3.CEL  | RHJ/LeJ                | M |
| SNP_mDIV_C8-97_090908.CEL     | RIIS/J                 | M |
| SNP_mDIV_B10-143_103008_3.CEL | RSV/LeJ                | M |
| SNP_mDIV_D9-144_103008_3.CEL  | SB/LeJ                 | M |
| SNP_mDIV_D10-145_103008_3.CEL | SEA/GnJ                | M |
| SNP_mDIV_D2-408_012709.CEL    | SEC/1GnLeJ             | M |
| SNP_mDIV_D3-409_012709.CEL    | SEC/1ReJ               | M |
| SNP_mDIV_D11-146_103008_3.CEL | SH1/LeJ                | M |
| SNP_mDIV_D4-410_012709.CEL    | SJL/Bm                 | M |
| SNP_mDIV_D1-36_081308.CEL     | SJL/J                  | M |
| SNP_mDIV_A2-148_111308.CEL    | SM/J                   | M |
| SNP_mDIV_A4-150_111308_2.CEL  | SSL/LeJ                | M |
| SNP_mDIV_D5-411_012709.CEL    | ST/bJ                  | M |
| SNP_mDIV_D6-412_012709.CEL    | STX/Le                 | M |
| SNP_mDIV_A5-151_111308.CEL    | SWR/J                  | M |
| SNP_mDIV_A6-152_111308.CEL    | TALLYHO/JngJ           | M |
| SNP_mDIV_A7-153_111308.CEL    | TKDU/DnJ               | M |
| SNP_mDIV_A8-154_111308.CEL    | TSJ/LeJ                | M |
| SNP_mDIV_D7-413_012709.CEL    | YBR/EiJ                | M |
| SNP_mDIV_A9-155_111308.CEL    | ZRDCT Rax<ey1>/ChUmdJ  | M |

836

837 CEL files of 114 classically inbred laboratory mouse strains were downloaded from the Jackson  
838 Laboratory Center for Genome Dynamics for genotyping algorithm training.

839

840

841

842 **S3 Table. Genotype summary of 44 study samples genotyped at 493,290 single nucleotide**  
843 **polymorphic loci located across the genome of *Mus musculus*.**

844 Genotyping summary results for all 44 Mouse Diversity Genotyping Array data files.

845 **(Too large to display. Please see separate PDF file)**

846

847

848

849

850

851

852

853

854

*Mouse single nucleotide polymorphic targets for cross hybridization in rodents*

855 **S4 Table. Study species evaluated with publicly available nuclear genome sequence**  
856 **information.**

| Sample Name               | Scientific Name               | Newest Assembly |
|---------------------------|-------------------------------|-----------------|
| House Mouse               | <i>Mus musculus</i>           | GRCm38.p6       |
| Ryukyu Mouse              | <i>Mus caroli</i>             | CAROLI_EIJ_v1.1 |
| Gairdner's Shrewmouse     | <i>Mus pahari</i>             | PAHARI_EIJ_v1.1 |
| Sprague Dawley Rat        | <i>Rattus norvegicus</i>      | Rnor_6.0        |
| North American Deer Mouse | <i>Peromyscus maniculatus</i> | Pman_1.0        |

857 Genomes accessed through the NCBI Genomes FTP site of samples under study  
858 (<ftp.ncbi.nlm.nih.gov/genomes/>).

859

860
